1 Comparative Analysis of T Cell Spatial Proteomics and the Influence of HIV Expression

2

3 Aaron L. Oom<sup>1,2,3,4</sup>, Charlotte A. Stoneham<sup>2,3,4</sup>, Mary K. Lewinski<sup>2,4</sup>, Alicia Richards<sup>5,6,7,8</sup>, Jacob M.

4 Wozniak<sup>1,9,10,11</sup>, Km Shams-Ud-Doha<sup>5,12</sup>, David J. Gonzalez<sup>9,10</sup>, Nevan J. Krogan<sup>6,7,8</sup>, John Guatelli<sup>1,2,3,4\*</sup>

5

6 <sup>1</sup>Biomedical Sciences Doctoral Program, University of California San Diego, La Jolla, CA 92093, USA

7 <sup>2</sup>School of Medicine, University of California San Diego, La Jolla, CA 92093, USA

8 <sup>3</sup>Veterans Medical Research Foundation, La Jolla, CA 92161, USA

9 <sup>4</sup>VA San Diego Healthcare System, La Jolla, CA 92161, USA

10 <sup>5</sup>Sanford Burnham Prebys Medical Discovery Institute, La Jolla, CA 92037, USA

11 <sup>6</sup>Department of Cellular and Molecular Pharmacology, University of California San Francisco, CA 94158,

12 USA

13 <sup>7</sup>Quantitative Biosciences Institute, University of California San Francisco, CA 94158, USA

14 <sup>8</sup>Institute for Virology and Immunology, J. David Gladstone Institutes, San Francisco, CA 94158, USA

15 <sup>9</sup>Department of Pharmacology, University of California San Diego, La Jolla, CA 92093, USA

16 <sup>10</sup>Skaggs School of Pharmacy and Pharmaceutical Sciences, University of California San Diego, La Jolla,

17 CA 92093, USA

18 <sup>11</sup>Current location: The Scripps Research Institute, La Jolla, CA 92037, USA

19 <sup>12</sup>Current location: Thermo Fisher Scientific, Grand Island, NY 14072, USA

20

21 Running title: T Cell Spatial Proteomics and Impact of HIV

22

23

## T Cell Spatial Proteomics and Impact of HIV

24 Abbreviations: acetonitrile (ACN), Bayesian analysis of differential localization experiments (BANDLE),  
25 Dynamic Organellar Mapping (D.O.M.), fetal bovine serum (FBS), fluorescence-assisted cell sorting  
26 (FACS), formic acid (FA), gene ontology (G.O.), Human Protein Atlas (HPA), iodoacetamide (IAA), mass  
27 spectrometry (MS), PBS+0.1% Tween-20 (PBS-T), penicillin/streptomycin (pen/strep), Principal  
28 Component Analysis (PCA), stable isotope labeling by amino acids in cell culture (SILAC), support vector  
29 machine (SVM), tandem mass tag (TMT), t-augmented Gaussian mixture modeling with *maximum a*  
30 *posteriori* estimates (TAGM-MAP), translocation analysis of spatial proteomics (TRANSPiRE), tris(2-  
31 carboxyethyl)phosphine (TCEP), ultra-performance liquid chromatography (UPLC)

## T Cell Spatial Proteomics and Impact of HIV

32 **Abstract:**

33           As systems biology approaches to virology have become more tractable, highly studied viruses  
34 such as HIV can now be analyzed in new, unbiased ways, including spatial proteomics. We employed  
35 here a differential centrifugation protocol to fractionate Jurkat T cells for proteomic analysis by mass  
36 spectrometry; these cells contain inducible HIV-1 genomes, enabling us to look for changes in the spatial  
37 proteome induced by viral gene expression. Using these proteomics data, we evaluated the merits of  
38 several reported machine learning pipelines for classification of the spatial proteome and identification of  
39 protein translocations. From these analyses we found that classifier performance in this system was  
40 organelle-dependent, with Bayesian t-augmented Gaussian mixture modeling outperforming support  
41 vector machine (SVM) learning for mitochondrial and ER proteins, but underperforming on cytosolic,  
42 nuclear, and plasma membrane proteins by QSep analysis. We also observed a generally higher  
43 performance for protein translocation identification using a Bayesian model, BANDLE, on SVM-classified  
44 data. Comparative BANDLE analysis of cells induced to express the wild-type viral genome vs. cells  
45 induced to express a genome unable to express the accessory protein Nef identified known Nef-  
46 dependent interactors such as TCR signaling components and coatomer complex. Lastly, we found that  
47 SVM classification showed higher consistency and was less sensitive to HIV-dependent noise. These  
48 findings illustrate important considerations for studies of the spatial proteome following viral infection or  
49 viral gene expression and provide a reference for future studies of HIV-gene-dropout viruses.

## T Cell Spatial Proteomics and Impact of HIV

### 50 **Introduction:**

51 Spatial proteomics is a methodologically diverse and rapidly growing field within mass  
52 spectrometry (MS) that aims to understand the subcellular localization of the human proteome<sup>1-7</sup>. While  
53 initial efforts focused on establishing techniques and reference maps for various cell lines, recent work by  
54 the Cristea group expanded the field to understand the whole-cell effects of viral infection using human  
55 cytomegalovirus (HCMV) as a prototype<sup>7</sup>. This work led to novel findings on the importance of  
56 peroxisomes in herpesvirus infectivity<sup>8</sup>, exemplifying the power of these methods for uncovering new viral  
57 biology. However, as this was a first in its class study, how different methodologies might impact the  
58 results of viral studies using spatial proteomics is unclear. Using the well-characterized HIV-1 as a model  
59 virus system, we aimed to compare the output of several published spatial proteomic analysis pipelines<sup>9-</sup>  
60 <sup>12</sup> as a survey of established methods.

61 To model HIV expression, we used a Jurkat T cell line that harbors a doxycycline-regulated HIV-1  
62 genome. These cells were previously developed by our group to generate nearly homogenous HIV-  
63 positive cell populations for MS analysis<sup>13</sup>. As an additional biological comparator, we examined both  
64 wild-type (WT) virus and a virus lacking the accessory gene *nef* ( $\Delta$ Nef). Nef is a small (27 kDa),  
65 myristoylated membrane-associated accessory protein expressed early during the viral replication  
66 cycle<sup>14,15</sup>. Nef increases viral growth-rate and infectivity<sup>16</sup>, and it dysregulates the trafficking of cellular  
67 membrane proteins such as CD4, class I MHC, and proteins involved in T cell activation such as CD28<sup>17</sup>  
68 and p56-Lck<sup>18</sup>. Some of these activities enable the virus to evade immune detection<sup>19,20</sup>. Here we use  
69 inducible Jurkat T cell lines containing either WT or  $\Delta$ Nef HIV-1<sub>NL4-3</sub> provirus and compare the spatial  
70 proteome of uninduced cells to cells post-induction with doxycycline. To fractionate the cells, we used a  
71 modified version of the Dynamic Organellar Mapping protocol<sup>5,6</sup> with additional centrifugation steps<sup>4</sup> to  
72 enhance organellar resolution, then analyzed the fractions by MS using TMT multiplexing.

73 Following the generation and processing of MS data, two broad steps are required for spatial  
74 proteomics: classification and hit determination. For classifying detected proteins into cellular organelles  
75 we compared two methods from pRoloc, an R software package developed by the Lilley lab<sup>12</sup>. The first  
76 was support vector machine (SVM) classification which outputs a label for each protein and an algorithm  
77 specific confidence score that can be used to threshold assignments<sup>1</sup>. The second was a Bayesian

## T Cell Spatial Proteomics and Impact of HIV

78 approach called t-augmented Gaussian mixture modeling with *maximum a posteriori* estimates (TAGM-  
79 MAP) which outputs a label for each protein and an actual probability of assignment<sup>11</sup>. To gauge the  
80 quality of these classifications, we compared the two methods using the QSep metric developed by the  
81 Lilley group<sup>21</sup>, which quantifies the separation, or resolution, of the organelles in question. We additionally  
82 cross-referenced our organellar assignments to existing organellar proteome databases<sup>22–25</sup>.

83 After classification, data were analyzed for translocating proteins following HIV expression. We  
84 compared three different methods for determining protein translocations: label-based movement,  
85 translocation analysis of spatial proteomics (TRANSPIRE)<sup>9</sup>, and Bayesian analysis of differential  
86 localization experiments (BUNDLE)<sup>10</sup>. Label-based movement relies strictly on identifying proteins that  
87 are consistently classified in one organelle prior to a cellular perturbation, then consistently classified in  
88 another organelle following the perturbation; this method was employed by the Cristea group in their  
89 HCMV study<sup>7</sup>. TRANSPIRE is a refined methodology from the Cristea lab that relies on generating  
90 synthetic translocations from proteins of known localization and uses Bayesian analysis to determine the  
91 likelihood of proteins of unknown localization behaving in a manner consistent with anticipated  
92 translocations following a cellular perturbation<sup>9</sup>. Lastly, BUNDLE is another method developed by the  
93 Lilley group that takes replicated data, both with and without a perturbation, and uses Bayesian analysis  
94 to yield a ranked list of possible translocations with their associated likelihood of occurrence<sup>10</sup>. We  
95 compared the hits from these various methods by cross-referencing hits with a previous study of the HIV  
96 interactome<sup>26</sup> as well as the more broad NIH HIV-1 Human Interaction Database<sup>27</sup>.

97 From these comparisons we found that the performance of different classifiers is organelle-  
98 dependent and shows varied effects from HIV expression. As determined by agreement with previously  
99 published organellar proteomes, classification with TAGM-MAP showed increased accuracy in  
100 mitochondrial and ER-classified proteins, while SVM outperformed TAGM-MAP with nuclear, cytosolic,  
101 and plasma membrane-classified proteins. We also observed generally higher performance for protein  
102 translocation using BUNDLE on SVM-classified data when compared to the HIV interactomes. BUNDLE  
103 analysis of WT and  $\Delta$ Nef data identified known Nef interactors involved in T cell activation and the  
104 coatomer complex. Finally, we found that SVM classification showed higher consistency and was less

## T Cell Spatial Proteomics and Impact of HIV

105 sensitive to HIV-dependent noise. These findings illustrate the complexities in choosing a computational  
106 method for spatial proteomics study and serve as a foundation for additional studies.

107

### 108 **Experimental Procedures:**

#### 109 *Experimental design and statistical rationale*

110 All fractionation experiments with mass spectrometric analysis were performed in technical  
111 triplicate for each condition (uninduced and induced), with two biological replicates for wild-type and  $\Delta$ Nef  
112 NL4-3 Jurkat cells (Fig. 1A). This yielded a total of 6 uninduced and 6 induced technical replicates for  
113 each virus type. Biological replicates were prepared on separate days and analyzed by mass  
114 spectrometry on separate days. Western blotting and flow cytometry were performed on each technical  
115 replicate. Analyses for QSep (Fig. 2B and C) used Welch's t-test to determine statistical significance.

116

#### 117 *Cell culture*

118 The doxycycline-inducible NL4-3 HIV-1 and NL4-3  $\Delta$ Nef Jurkat cell lines were previously  
119 described<sup>13,28</sup>. The replication-incompetent genome used was based on pNL4-3 but lacked most of the 5'  
120 U3 region, encoded a self-inactivation deletion in the 3' LTR, and contained the V3 region from the R5-  
121 tropic 51-9 virus<sup>29</sup> to prevent the cell-cell fusion of the Jurkat T cells used herein, which do not express  
122 CCR5. Inducible cells were cultured in RPMI 1640 media supplemented with penicillin/streptomycin  
123 (pen/strep) and 10% Tet-free fetal bovine serum (FBS), as well as puromycin (1  $\mu$ g/mL) and G418 (200  
124  $\mu$ g/mL) to maintain persistence of the tetracycline trans-activator and the inducible genome. Cells were  
125 passaged every two days to keep concentrations between  $3.5 \times 10^5$  and  $1 \times 10^6$  cells/mL. Cells were  
126 maintained at 37°C, 5% CO<sub>2</sub>, and 95% humidity.

127

#### 128 *Doxycycline induction and fractionation*

129 On the day before fractionation,  $2.016 \times 10^9$  cells were plated at  $6 \times 10^5$  cells/mL in T75 flasks at a  
130 total volume of 40 mL/flask. Half of these cells were induced to express HIV-1/HIV-1 $\Delta$ Nef with  
131 doxycycline (1  $\mu$ g/mL) for 18 hours, while the other half remained uninduced. Following induction, cells of  
132 each condition, i.e. uninduced and induced, were split into three technical replicates, and then centrifuged

## T Cell Spatial Proteomics and Impact of HIV

133 at 500xg for 5 min at 4°C. Each technical replicate was pooled into a single 50 mL tube using ice cold 1X  
134 PBS, then counted by hemocytometer. From each technical replicate,  $3 \times 10^8$  cells were fractionated. Two  
135 aliquots of cells were taken from each technical replicate for whole cell western blots and testing induction  
136 by flow cytometry.

137 The fractionation protocol used here is derived from the Dynamic Organellar Maps method<sup>5</sup> with  
138 additional centrifugation steps<sup>4</sup> and TMT-based MS analysis rather than SILAC<sup>6</sup>. Cells for fractionation  
139 were centrifuged at 500xg for 5 min at 4°C then resuspended in ice-cold PBS and incubated for 5 min on  
140 ice. Cells were again centrifuged at 500xg for 5 min at 4°C, then resuspended in ice-cold hypotonic lysis  
141 buffer (25 mM Tris-HCl (pH 7.5), 50 mM sucrose, 0.5 mM MgCl<sub>2</sub>, and 0.2 mM EGTA in water) and  
142 incubated for 5 min on ice. Using a 7 mL Dounce homogenizer, cells were homogenized with 20 full  
143 strokes of the tight pestle. Cell homogenates were then immediately transferred to a 13 mL (14x89 mm)  
144 ultracentrifuge tube with sufficient ice-cold hypertonic sucrose buffer (1.25 M sucrose, 25 mM Tris-HCl  
145 (pH 7.5), 0.5 mM MgCl<sub>2</sub>, and 0.2 mM EGTA in water) to restore 250 mM sucrose concentration. All  
146 replicates were then centrifuged at 1,000xg for 10 min at 4°C in a Beckman Coulter ultracentrifuge (SW-  
147 41 Ti rotor), balancing each tube with balance buffer (250 mM sucrose, 25 mM Tris-HCl (pH 7.5), 0.5 mM  
148 MgCl<sub>2</sub>, and 0.2 mM EGTA in water). Supernatants were transferred to a fresh ultracentrifuge tube,  
149 balanced with balance buffer, then fractionated using the following differential centrifugation protocol:  
150 3,000xg for 10 min, 5,400xg for 15 min, 12,200xg for 20 min, 24,000xg for 20 min, 78,400xg for 30 min,  
151 110,000xg for 35 min, and 195,500xg for 40 min All centrifugation steps were performed at 4°C with  
152 pellets from each spin being resuspended in SDS buffer (2.5% SDS and 50 mM Tris-HCl (pH 8.0) in  
153 water). Fractions were then heated for 10 minutes at 72°C. Protein content of each fraction was quantified  
154 in triplicate using a bicinchoninic acid (BCA) protein assay (Thermo-Fisher).

155

### 156 *Confirmatory western blots and p24 flow cytometry*

157 Prior to mass spectrometric analysis of fractions, induction and fractionation were evaluated by  
158 flow cytometry and western blotting (Fig. 1B and C). For p24 flow cytometry, an aliquot of  $2 \times 10^6$  cells from  
159 each technical replicate were pelleted at 500xg for 5 min at 4°C then resuspended in ice-cold FACS  
160 buffer (2% FBS and 0.1% sodium azide in 1X PBS). The cells were again pelleted at 500xg for 5 min at

## T Cell Spatial Proteomics and Impact of HIV

161 4°C then resuspended in Cytotfix/Cytoperm reagent (BD Biosciences) and incubated on ice for 30 min  
162 Following fixation/permeabilization, cell suspensions were diluted with wash buffer and pelleted at 500xg  
163 for 5 min at 4°C. Cells were resuspended in p24 primary antibody solution (1:100 dilution of p24-FITC  
164 antibody clone KC57 (Beckman Coulter) diluted in perm/wash buffer) and incubated on ice for 30 min in  
165 darkness. Ice-cold FACS buffer was added to each sample and cells were pelleted at 500xg for 5 min at  
166 4°C. The intracellular p24 was analyzed using an Accuri C6 flow cytometer (BD Biosciences). Uninduced  
167 cells had an average p24+ population of 0.27% (S.D. = 0.20) and live cell population of 85.78% (S.D. =  
168 3.37). Induced cells had an average p24+ population of 94.85% (S.D. = 1.23) and live cell population of  
169 79.25% (S.D. = 4.35).

170 An aliquot of  $1 \times 10^7$  cells from each technical replicate was lysed in SDS buffer and probe  
171 sonicated on ice until no longer viscous. 3,000xg fractions were also probe sonicated. The samples were  
172 mixed with 4X loading buffer (200 mM Tris-HCl (pH 6.8), 8% SDS, 40% glycerol, 200 mM tris(2-  
173 carboxyethyl)phosphine-HCl (TCEP), and 0.04% bromophenol blue in water) and proteins were then  
174 separated on 10% SDS-PAGE gels at a constant 70V. Proteins were transferred to polyvinylidene  
175 difluoride (PVDF) membranes for 1 hour using the Trans-Blot turbo (BioRad) system using standard  
176 conditions. The membranes were blocked in 5% milk in 1X PBS-T for 30 min at room temperature prior to  
177 incubation with primary antibodies diluted in 1% milk and 0.05% sodium azide in 1X PBS-T: sheep anti-  
178 Nef (gift from Celsa Spina, diluted 1:3,000), mouse anti-p24 (Millipore, diluted 1:500), Chessie8 (mouse  
179 anti-gp41, NIH AIDS Research and Reference Reagent program<sup>30</sup>, diluted 1:10,000), rabbit anti-Vpu (NIH  
180 AIDS Research and Reference Reagent program ARP-969, contributed by Dr. Klaus Strebel, diluted  
181 1:1,000), and mouse anti-GAPDH (GeneTex, diluted 1:5,000). The blots were washed and probed with  
182 either horseradish peroxidase-conjugated goat anti-mouse, HRP-goat anti-rabbit, or HRP-rabbit anti-  
183 sheep secondary (BioRad) diluted 1:3,000, incubating for 1 hour at room temperature on a shaker.  
184 Apparent molecular mass was estimated with PageRuler protein standard (Thermo Scientific). Blots were  
185 imaged using Western Clarity detection reagent (BioRad) before detection on a BioRad Chemi Doc  
186 imaging system with BioRad Image Lab v5.1 software.

187

188 *Sample digestion for mass spectrometry*



## T Cell Spatial Proteomics and Impact of HIV

189 Disulfide bonds were reduced with 5 mM TCEP at 30°C for 60 min and cysteines were  
190 subsequently alkylated (carbamidomethylated) with 15 mM iodoacetamide (IAA) in the dark at room  
191 temperature for 30 min. Proteins were then precipitated with 9 volumes of methanol, pelleted and  
192 resuspended in 1M urea, 50 mM ammonium bicarbonate. Following precipitation, protein concentration  
193 was determined using a BCA protein assay. A total of 0.2 mg of protein was subjected to overnight  
194 digestion with 8.0 µg of mass spec grade Trypsin/Lys-C mix (Promega). Following digestion, samples  
195 were acidified with formic acid (FA) and subsequently 150 µg peptides were desalted using AssayMap  
196 C18 cartridges mounted on an Agilent AssayMap BRAVO liquid handling system, C18 cartridges were  
197 first conditioned with 100% acetonitrile (ACN), followed by 0.1% FA. The samples were then loaded onto  
198 the conditioned C18 cartridge, washed with 0.1% FA, and eluted with 60% MeCN, 0.1% FA. Finally, the  
199 organic solvent was removed in a SpeedVac concentrator prior to LC-MS/MS analysis.

200

### 201 *TMT Labeling*

202 Peptide concentration was determined using a Nanodrop, and a total of 15 µg of peptide was  
203 then used for TMT labeling, each replicate serving as a multiplex. Briefly, dried peptide sample was  
204 resuspended in 200 mM HEPES (pH 8) and incubated for 1 h at room temperature with one of the  
205 TMT10-plex reagents (ThermoFisher) solubilized in 100% anhydrous ACN. Reactions were quenched  
206 using a 5% hydroxylamine solution at 1-2 µl per 20 µl TMT reagent. The multiplexed samples were then  
207 pooled and dried in a SpeedVac. The labeled peptides were resuspended in 0.1% FA. After sonication for  
208 1min, the sample was desalted manually using SepPak; the column was first conditioned with 100%  
209 ACN, followed by 0.1% FA. Sample was loaded, then washed with 0.1% FA and eluted in a new vial with  
210 60% ACN, 0.1% FA. Finally, the organic solvent was removed using a SpeedVac concentrator prior to  
211 fractionation.

212

### 213 *High pH Reverse-Phase Fractionation*

214 Dried samples were reconstituted in 20mM ammonium formate (pH ~10) and fractionated using a  
215 Waters ACQUITY CSH C18 1.7 µm 2.1 × 150 mm column mounted on a MClass Ultra Performance  
216 Liquid Chromatography (UPLC) system (Waters corp., Milford, MA) at a flow rate of 40 µl/min with buffer

## T Cell Spatial Proteomics and Impact of HIV

217 A (20 mM ammonium formate pH 10) and buffer B (100% ACN). Absorbance values at 215 nm and 280  
218 nm were measured on a Waters UV/Vis spectrophotometer, using a flowcell with a 10 mm path length.  
219 Peptides were separated by a linear gradient from 5% B to 25% B in 62.5 min followed by a linear  
220 increase to 60% B in 4.5 min and 70% in 3 min and maintained for 7 min before increasing to 5% in 1 min  
221 Twenty-four fractions were collected and pooled in a non-contiguous manner into twelve total fractions.  
222 Pooled fractions were dried to completeness in a SpeedVac concentrator.

223

### 224 *LC-MS<sup>3</sup> Analysis*

225 Dried samples were reconstituted with 0.1% FA and analyzed by LC-MS/MS on an Orbitrap  
226 Fusion Lumos mass spectrometer (Thermo) equipped with an Easy nLC 1200 ultra-high pressure liquid  
227 chromatography system interfaced via a Nanospray Flex nanoelectrospray source (Thermo). Samples  
228 were injected on a C18 reverse phase column (25 cm x 75  $\mu$ m packed with Waters BEH 1.7  $\mu$ m particles)  
229 and separated over a 120-min linear gradient of 2-28% solvent B at a flow rate of 300nL/min The mass  
230 spectrometer was operated in positive data-dependent acquisition mode.

231 Parameter settings were set as follows: FT MS1 resolution (120 000) with AGC target of 1e6,  
232 ITMS2 isolation window (0.4 m/z), IT MS2 max. inject time (120 ms), IT MS2 AGC (2E4), IT MS2 CID  
233 energy (35%), SPS ion count (up to 10), FT MS3 isolation window (0.4 m/z), FT MS3 max. inject time  
234 (150 ms), FT MS3 resolution (50 000) with AGC target of 1e5. A TOP10 method was used where each FT  
235 MS1 scan was used to select up to 10 precursors for interrogation by CID MS2 with readout in the ion  
236 trap. Each MS2 was used to select precursors (SPS ions) for the MS3 scan which measured reporter ion  
237 abundance.

238

### 239 *Mass spectrometry spectra identification*

240 Raw files were analyzed using Proteome Discoverer v2.3 (Thermo Fisher Scientific). MS/MS  
241 spectra were searched against a concatenated database containing Uniprot human and HIV-1 proteins  
242 (downloaded 02/03/20) and reverse decoy sequences using the Sequest algorithm<sup>31</sup>; the database  
243 contained 20,367 total entries. Mass tolerance was specified at 50 ppm for precursor ions and 0.6 Da for  
244 MS/MS fragments. Static modifications of TMT 10-plex tags on lysine and peptide n-termini (+229.162932

## T Cell Spatial Proteomics and Impact of HIV

245 Da) and carbamidomethylation of cysteines (+57.02146 Da), and variable oxidation of methionine  
246 (+15.99492 Da) were specified in the search parameters. Data were filtered to a 1% false discovery rate  
247 at the peptide and protein level through Percolator<sup>32</sup> using the target-decoy strategy<sup>33</sup>. TMT reporter ion  
248 intensities were extracted from MS3 spectra within Proteome Discoverer to perform quantitative analysis.

249

### 250 *Computational analysis*

251 Matching biological replicates were combined (i.e. WT biological replicate 1 and 2), then analyzed  
252 using the various pipelines described. The *Homo sapiens* (“hsap”) marker set from pRoloc was used in all  
253 cases. For classification and hit generation, only the proteins commonly detected across matched  
254 biological replicates were analyzed to allow for consistency in comparing methods on the same data set.

255 The pRoloc implementation of SVM<sup>12</sup> was performed on row-normalized data sets, while the  
256 pRoloc implementation of TAGM-MAP<sup>11</sup> required PCA transformation and no row-normalization with the  
257 first four principal components carried forward. The PCA transformation was used because of floating  
258 point arithmetic errors that arose because of highly correlated features. Default parameters for algorithms  
259 were used excepting the following:

260 SVM hyperparameter classification: 10 times 10-fold cross-validation

261 SVM classification threshold: median algorithm score for each organelle

262 TAGM-MAP model training: 200 iterations

263 BUNDLE: 6 chains

264 TRANSPIRE was run on averaged row-normalized datasets, i.e., technical replicates were row-  
265 normalized then values for each feature were averaged for each protein across matched technical  
266 replicates. Organelles were combined into 5 groups: 1) Golgi apparatus/plasma membrane/endoplasmic  
267 reticulum/peroxisomes/lysosomes, 2) cytosol/actin cytoskeleton/proteasome, 3) nucleus, 4) mitochondria,  
268 and 5) 40S/60S ribosome. The number of inducing points and the kernel function were chosen from  
269 amongst the suggested values in the TRANSPIRE documentation. For these datasets, 75 inducing points  
270 and the squared exponential kernel performed best and were used in the analysis.

271 The average distribution of proteins across organelles was calculated by determining the average  
272 organellar distribution for a single technical replicate, then averaging the values of matched technical

## T Cell Spatial Proteomics and Impact of HIV

273 replicates. Marker profiles were generated by averaging the behavior of markers for a given organelle  
274 within a technical replicate, then averaging those values across technical replicates for each organelle.  
275 Organellar QSep scores were calculated by averaging the individual QSep scores between two  
276 organelles across all matched technical replicates, then plotting the distribution of those averages.

277 Comparisons to the Human Protein Atlas (HPA) were completed by combining several HPA  
278 subcellular localization annotations to align with the organelles used by pRoloc:

- 279 1. Nuclear membrane, nucleoli fibrillar center, nucleoli rim, nucleoli, kinetochore, mitotic  
280 chromosome, nuclear bodies, nuclear speckles, and nucleoplasm: Nucleus
- 281 2. Actin filaments and focal adhesion sites: Actin Cytoskeleton
- 282 3. Plasma membrane and cell junctions: Plasma Membrane

283 Remaining designations within the HPA beyond the above and those in common with pRoloc's "hsap"  
284 markers were not considered. The 40S Ribosome, 60S Ribosome, and Proteasome classes from the  
285 SVM and TAGM-MAP classified data were collapsed into the Cytosol label.

286 Thresholds for Figures 6 and S8 were determined by dividing the size of the Jäger HIV  
287 interactome<sup>26</sup>, 453 proteins, or the NIH HIV interactome<sup>27</sup>, 4,628 proteins, by the predicted human  
288 proteome size of 19,773 proteins<sup>34</sup>. G.O. analysis for Figure 6B was conducted using the STRING  
289 database<sup>35</sup>.

290

### 291 **Results:**

292 *Doxycycline-inducible HIV-1<sub>NL4-3</sub> Jurkat T cells are a scalable and uniform system for subcellular*  
293 *fractionation and proteomic studies.*

294 The WT HIV-1 inducible cells used here were previously generated and used for whole-cell  
295 quantitative- and phospho-proteomics<sup>13</sup>. To avoid the formation of syncytia, which could alter the  
296 subcellular fractionation and subsequent spatial proteomic data, the inducible HIV-1<sub>NL4-3</sub> genomes were  
297 modified with a CCR5-tropic Env protein to avoid cell-cell fusion between the CCR5-negative Jurkat cells.  
298 Due to the high induction rates of HIV-1 expression and the scalability of this culture system, we  
299 reasoned that it would be amenable to subcellular fractionation by differential centrifugation with  
300 subsequent MS analysis (Fig. 1A). To determine the optimal time-point for analysis following induction of

## T Cell Spatial Proteomics and Impact of HIV

301 HIV-1 expression, cells were treated with doxycycline for 0, 4, 8, 12, 16, and 18 hours, and the  
302 expression of HIV-1 proteins was detected by western blotting and flow cytometry (Fig. 1B and C). WT  
303 cells began to express detectable Nef by 4 hours post-induction, and both WT and  $\Delta$ Nef cells expressed  
304 p55 Gag precursor (the precursor protein for virion structural proteins) by 8 hours and gp160 (the  
305 envelope glycoprotein precursor) by 12 hours. By 18 hours, viral proteins were robustly expressed; about  
306 90-95% of both WT and  $\Delta$ Nef cells were positive by flow cytometry for p24 capsid (a proteolytic product of  
307 p55).

308 Subcellular fractionation was performed 18 hours post-induction; the cells were mechanically  
309 ruptured with a Dounce homogenizer in hypotonic solution, then subjected to a differential centrifugation  
310 protocol before preparation for quantitative, multiplexed MS analysis. Uninduced and induced cells were  
311 handled in technical triplicate for each biological replicate (n=2). We used a modified version of the  
312 Dynamic Organellar Mapping (D.O.M.) protocol<sup>5,6</sup> with additional fractions generated at 110,000xg and  
313 195,500xg to increase the resolution of the classification analysis; a similar method of expanded  
314 differential centrifugation fractionation was previously described by the Lilley group<sup>36</sup>. As a quality control  
315 before MS, protein yields were quantified for each fraction (Fig. 1D). The post-nuclear fractions accounted  
316 for only ~10-15% of total cellular protein, presumably because nuclear proteins and soluble cytoplasmic  
317 proteins that failed to pellet at 195,500xg were discarded, leaving primarily membranous organelles or  
318 organellar fragments and large, cytoplasmic complex proteins in the fractions analyzed. We also  
319 observed decreasing protein yields across the fractions, with an increase in the 78,400xg fraction,  
320 consistent with the original D.O.M. study using HeLa cells<sup>5</sup>. In further support of differential fractionation,  
321 varied abundances of viral proteins across the fractions in cells expressing either the WT or  $\Delta$ Nef  
322 genomes were observed by western blotting (Fig. 1E). Following confirmation of differential fractionation,  
323 we analyzed all fractions by LC-MS<sup>3</sup> with TMT-10 multiplexing (Fig. 1A).

324 To determine the consistency of the MS analysis we used unsupervised hierarchical clustering by  
325 Spearman correlation coefficient for the individual fractions. We found that for both the WT and  $\Delta$ Nef data  
326 the fractions clustered by *g*-force rather than biological replicate (Fig. S1 and 2), suggesting consistent  
327 quantification values. Because the WT and  $\Delta$ Nef Jurkat cell lines represent individual clones for each, we

## T Cell Spatial Proteomics and Impact of HIV

328 also compared the uninduced fractions of the WT and  $\Delta$ Nef data to each other. This comparison showed  
329 that fractions still clustered by *g*-force rather than HIV genome (Fig. S3).

330

331 *SVM shows greater organellar resolution than TAGM-MAP even with stringent thresholds of classification*  
332 *for TAGM-MAP.*

333 To classify the fractionation data and identify translocating proteins, we employed a variety of  
334 previously published methods (Fig. 2A). As several resources detail known HIV interactors<sup>26,27</sup>, we  
335 primarily focused on comparing classification and translocation identification methods using our WT data.  
336 In subsequent analyses, we examined the  $\Delta$ Nef data to determine the power of various methods in  
337 identifying Nef-specific effects.

338 For classification, proteins were classified using either the pRoloc implementation of SVM or  
339 TAGM-MAP. As the differential centrifugation protocol employed here is a modified version of the D.O.M.  
340 method which generates only 5 fractions<sup>5</sup>, we first examined whether our two additional fractions  
341 improved organellar resolution. The D.O.M. method classifies proteins with SVM, so we compared the  
342 resolution of organelles with the QSep analysis<sup>21</sup> using the first 5 fractions for SVM classification, then the  
343 first 6 fractions, and finally all 7 fractions (Fig. 2B). We found that while the addition of the 110,000xg spin  
344 alone had no significant effect on organellar resolution as compared to the original method, the  
345 subsequent addition of the 195,500xg spin yielded a significant increase from a mean QSep score of 3.74  
346 to 4.05 (median scores 2.97 and 3.50, respectively). In light of this, all subsequent analyses on the SVM  
347 data were performed on the full 7 fractions.

348 To determine if an alternate method for classification would perform better than SVM, we also  
349 tested the pRoloc implementation of TAGM-MAP. The outputs from TAGM-MAP give both a localization  
350 and a probability that the given protein is located in that organelle. These probabilities allowed us to test  
351 the effect of different probability thresholds on TAGM-MAP's QSep scores. While using a 50% threshold,  
352 i.e. converting all proteins with a probability of localization lower than 50% to an "unknown" designation,  
353 showed no significant effect, 75% and 90% thresholds both showed significant gains over no thresholding  
354 (Fig. 2C). A 90% threshold showed no significant increase in QSep scores over the 75% threshold, so  
355 subsequent analyses employed the 75% threshold for TAGM-MAP classification. Of importance, we

## T Cell Spatial Proteomics and Impact of HIV

356 observed that the QSep scores from SVM classification were on average higher than those from TAGM-  
357 MAP even when comparing TAGM-MAP's highest condition (90% probability threshold, average score of  
358 3.55) to SVM's lowest condition (5 fractions, average score of 3.74).

359

360 *SVM classifies proteins more consistently than TAGM-MAP.*

361 We next wanted to understand how the SVM and TAGM-MAP methods compared for consistency  
362 of classification across WT replicates (Fig. 3A and B). Both SVM (Fig. 3A) and TAGM-MAP (Fig. 3B)  
363 showed a low percentage (~10-15%) of proteins that were classified identically in 6 out of 6 technical  
364 replicates for either WT uninduced or induced. However, allowing for a majority of replicates, i.e. 4 out of  
365 6, gave ~70-75% of proteins as classified consistently by SVM (Fig. 3A). This compared to ~50-55% of  
366 proteins classified to a similar consistency by TAGM-MAP (Fig. 3B). HIV expression modestly decreased  
367 the consistency of both SVM and TAGM-MAP (~5% difference), suggesting an increase in experimental  
368 noise from HIV expression.

369 Looking at the average distribution of proteins across organelles, we found that SVM yielded a  
370 higher percentage of proteins that reverted to an unknown designation (Fig. 3C, 44% of proteins); this  
371 may partly explain the higher QSep scores generally seen for SVM compared to TAGM-MAP (Fig. 2).  
372 However, this percentage is stable between WT uninduced and induced replicates, while the lower  
373 percentage of unknown proteins (32% for uninduced and 41% for induced) for TAGM-MAP is more  
374 sensitive to HIV expression. Similar trends were seen within the  $\Delta$ Nef data (Fig. S4); marker behavior for  
375 WT (Fig. S5) and  $\Delta$ Nef (Fig. S6) is also similar, which likely explains the consistent trends. These data  
376 show a greater consistency for SVM classification and additionally suggest that SVM is less susceptible  
377 to noise introduced into data by HIV expression.

378

379 *Agreement between SVM and TAGM-MAP classification is organelle-dependent and is variably affected*  
380 *by HIV expression.*

381 To determine the concordance of SVM and TAGM-MAP for classification, we examined all  
382 proteins that were classified consistently in at least 4 of 6 WT replicates for both SVM and TAGM-MAP.  
383 We found more such proteins for the uninduced replicates (Fig. 4A), 1,863 proteins, as compared to the

## T Cell Spatial Proteomics and Impact of HIV

384 induced replicates (Fig. 4B) with 1,448 proteins. This difference may be attributable to the decrease in  
385 classification consistency caused by HIV expression for both SVM and TAGM-MAP, which would be  
386 accentuated by any increased susceptibility of TAGM-MAP to HIV-dependent noise. Of these consistently  
387 classified proteins, HIV expression minimally affected classifier agreement; 65% agreed between SVM  
388 and TAGM-MAP for WT uninduced and 69% agreed between SVM and TAGM-MAP for induced  
389 replicates (see diagonal of heatmaps). However, HIV expression increased the proportion of proteins that  
390 were consistently designated unknown by both SVM and TAGM-MAP: in uninduced cells, 40% of proteins  
391 agreed upon by the two methods were designated unknown (Fig. 4A), while 71% of agreed upon proteins  
392 were designated unknown from induced cells (Fig. 4B). This shift seems primarily driven by the increase  
393 in unknown designations for TAGM-MAP following HIV expression: in uninduced replicates, 52% of  
394 proteins designated unknown by SVM agreed with TAGM-MAP, but in induced replicates, 81% of these  
395 proteins agreed with TAGM-MAP. Matching trends were seen in  $\Delta$ Nef data (Fig. S7). Taken together,  
396 these data suggest that while HIV expression has little effect on the proportion of consistently classified  
397 proteins that are agreed upon by the two classifiers, the proportion of these proteins that are designated  
398 unknown is increased, and the overall number of consistently classified proteins is decreased.

399 We found that proteins from the cytosol, ER, and mitochondria were the most frequent among  
400 consistently classified proteins. These three organelles also showed the best agreement between SVM  
401 and TAGM-MAP for uninduced replicates (Fig. 4A and S4A). However, HIV expression decreased the  
402 proportion of cytosolic proteins and ER proteins in agreement between SVM and TAGM-MAP: 73% of all  
403 proteins classified as cytosolic and 85% of all proteins classified as ER agreed for WT uninduced  
404 replicates, but only 31% of cytosolic proteins and 67% of ER proteins agreed for induced replicates. This  
405 decrease was smaller for mitochondrial proteins: 62% for uninduced and 58% for induced. Similar trends  
406 for cytosolic and mitochondrial proteins were seen in  $\Delta$ Nef data, but ER proteins showed little change  
407 (Fig. S7). These data show an organelle-dependent trend in classifier agreement that is variably affected  
408 by HIV expression.

409

410 *TAGM-MAP classification yields higher agreement than SVM classification with reported ER and*  
411 *mitochondria proteomes, but lower agreement in other organelles.*



## T Cell Spatial Proteomics and Impact of HIV

412 To gauge the quality of our classifications, we compared those proteins that were consistently  
413 classified, i.e. 4 out of 6 replicates, for WT uninduced to several published spatial proteomes:  
414 MitoCarta2.0 database<sup>22</sup>, a study of the mitochondrial matrix proteome<sup>23</sup>, and a review of lysosome  
415 proteomic studies<sup>24</sup> (Fig. 5A). Examining those proteins from each study that were detected in our  
416 datasets, we found that TAGM-MAP consistently out-performed SVM for mitochondria but performed less  
417 well for lysosomes. We also compared only those proteins that received an organellar classification, i.e.  
418 we excluded consensus unknown designations, to see if a focus on only proteins that remained classified  
419 would change the performance of SVM (orange bars) or TAGM-MAP (dark orange bars). SVM was more  
420 responsive to the exclusion of unknown proteins compared to TAGM-MAP, which is likely due to the lower  
421 proportion of unknown proteins in the TAGM-MAP uninduced condition.

422 We did a similar analysis for additional organelles by comparing to the Human Protein Atlas  
423 (HPA)<sup>25</sup>. To obtain a baseline to our analysis, we focused on those proteins considered by the HPA to be  
424 localized to a single organelle with high confidence (enhanced rating). Of those proteins, we then plotted  
425 the percentage that were similarly classified by SVM or TAGM-MAP (Fig. 5B). Again, we found that  
426 TAGM-MAP outperformed SVM for mitochondrial proteins, and we saw a similar trend for ER proteins,  
427 albeit to a lesser degree. Conversely, SVM outperformed TAGM-MAP in the Golgi apparatus, nucleus,  
428 peroxisomes, and plasma membrane, although only two proteins were considered for the peroxisome.  
429 Similar to our observations above, the exclusion of unknown proteins yielded a larger increase in  
430 percentage agreement for SVM (orange vs blue bars) than TAGM-MAP (dark orange vs green bars); this  
431 exclusion also increased the performance in the cytosol for SVM over TAGM-MAP. These data  
432 correspond well to those of Figure 4A where 114 proteins designated as unknown by SVM were classified  
433 as mitochondrial by TAGM-MAP. Similar trends were found within  $\Delta$ Nef data (Fig. S8). Taken together,  
434 this suggests that at least in this cell system and using these fractionation methods, TAGM-MAP is better  
435 suited for spatial proteomic studies focused on the mitochondria and the ER, while SVM is better suited  
436 for studies of the Golgi, nucleus, and plasma membrane. This finding was surprising as we observed  
437 higher average QSep scores for the mitochondria and ER in WT replicates using SVM as compared to  
438 TAGM-MAP (Fig. S9), with less of a difference in  $\Delta$ Nef replicates (Fig. S10), which suggests an imperfect  
439 correlation between QSep scores and general accuracy for certain organelles.

## T Cell Spatial Proteomics and Impact of HIV

440

441 *SVM-based BUNDLE of WT replicates yielded the best agreement of HIV-dependent translocations with*  
442 *known HIV interactomes; partial overlap with  $\Delta$ Nef translocation hits.*

443         Following our analysis of classifiers, we examined various pipelines for identifying protein  
444 translocations. We inputted our SVM and TAGM-MAP classified data into BUNDLE<sup>10</sup> and a basic label-  
445 based analysis<sup>7</sup>, and inputted unclassified data into TRANSPIRE<sup>9</sup> (Fig. 2A). For TRANSPIRE, we  
446 combined the organelles into 5 groups: 1) Golgi apparatus/plasma membrane/endoplasmic  
447 reticulum/peroxisomes/lysosomes, 2) cytosol/actin cytoskeleton/proteasome, 3) nucleus, 4) mitochondria,  
448 and 5) 40S/60S ribosome. This is in line with the authors' recommendation to combine similarly behaving  
449 organelles to increase translocation confidence<sup>9</sup>, although in our case we lose the ability to identify  
450 proteins moving between the membranous organelles most likely to be affected by Nef, i.e. secretory  
451 organelles. To compare the performance of these five methods, we cross-referenced their hits against an  
452 HIV interactome derived from affinity purification-mass spectrometry (AP-MS)<sup>26</sup> as well as the NIH HIV  
453 interactome<sup>27</sup>. The AP-MS study is more stringent since it includes only those proteins that directly  
454 complex with HIV proteins, while the NIH HIV interactome includes proteins that are affected by HIV even  
455 in the absence of evidence for a direct interaction. We found that the percentage of hits from each  
456 method that were in the interactomes was consistently above the threshold expected by chance (Fig. 6A,  
457 dashed line). Comparing the methods, the top 50 hits from the BUNDLE analysis of SVM-classified data  
458 performed best for both interactomes with 20% and 84% of hits in the Jäger et al study (direct  
459 interactome by AP-MS) and NIH HIV interactome (functional as well as direct interactors), respectively. Of  
460 note, ~1,500 proteins were considered to be translocation hits by the BUNDLE analysis of SVM, i.e.  
461 greater than 95% probability of translocation. The validity of this value is difficult to gauge, but it is much  
462 higher than the ~50 proteins from the BUNDLE analysis of TAGM-MAP-classified data with a similar  
463 probability of translocation. We conducted a similar hit analysis on our  $\Delta$ Nef inducible line and found that  
464 SVM-based BUNDLE was still the highest performer for the NIH HIV interactome but was only 3<sup>rd</sup> best for  
465 the AP-MS interactome (Fig. S11).

466         The top 250 hits from SVM-based BUNDLE for WT and  $\Delta$ Nef were compared to see if the method  
467 could identify Nef-dependent translocations (Fig. 6B); hits that were detected by MS in only WT or  $\Delta$ Nef

## T Cell Spatial Proteomics and Impact of HIV

468 replicates were removed to avoid detection bias. Of those hits found only for WT, we observed several  
469 known Nef targets and cofactors: ZAP70 (ref.<sup>37</sup>), Lck<sup>18,38</sup>, STAT1 (ref.<sup>39</sup>), and coatomer complex I (COPI  
470 complex)<sup>40,41</sup>. Five separate proteins in the COPI complex appear together as well as three proteins from  
471 the T cell signaling pathway, suggesting high coverage of perturbed complexes. For commonly shared  
472 hits, proteins involved in cytoskeletal organization were enriched. Disruption of the cytoskeleton following  
473 infection with HIV has been attributed to Nef among other viral proteins, but the enriched proteins here  
474 lacked known targets of Nef but instead included ROCK1, an interactor of HIV Tat, and filamin-A, an  
475 interactor of HIV Gag<sup>42</sup>. We were surprised to see two components of the AP2 complex, known  
476 interactors of Nef<sup>43</sup>, and HLA class B, a known target of Nef<sup>44,45</sup>, in the  $\Delta$ Nef only translocations. The SVM  
477 classification for these select proteins and STRING diagrams of the full protein sets are shown in the  
478 Supplemental Figures (Fig. S12-15). Notably, the SVM classifications rarely provided definitive organellar  
479 translocations for the hits identified by BUNDLE (Fig. S12). In some cases, this was due to the majority of  
480 replicates becoming unclassified in the induced condition. An interesting exception is Filamin-A: although  
481 a translocation hit in both WT and  $\Delta$ Nef cells by BUNDLE (Fig. 6B), by SVM classification Filamin-A  
482 moves from the actin cytoskeleton to the cytosol in cells expressing WT but not  $\Delta$ Nef (Fig. S12K). While  
483 the basis for such analytic discrepancies is unclear, taken together these data suggest potential value in  
484 identifying novel HIV cofactors, targets, and interactors via BUNDLE analysis of spatial proteomics data.

485

### 486 **Discussion:**

487 We have detailed here a comparison of computational methods within the field of spatial  
488 proteomics as an example and guide for researchers hoping to use these methods to better understand  
489 viral infection and replication. Extensive work in the field, particularly by the Lilley<sup>2,11,21,36,46</sup>, Cristea<sup>7-9</sup>, and  
490 Borner groups<sup>4-6,47</sup> along with their collaborators, offers a variety of established choices for fractionation,  
491 classification, and translocation identification methods. To build off of the work of the Cristea group with  
492 HCMV, we chose to examine HIV-1 as a model virus due to the existing wealth of knowledge on HIV-  
493 dependent protein interactions and translocations. We found in our T cell line model and using differential  
494 centrifugation for cell fractionation that the choice of computational method for classification is organelle-  
495 dependent: TAGM-MAP offered an advantage for mitochondrial and ER proteins, while SVM performed

## T Cell Spatial Proteomics and Impact of HIV

496 better for the Golgi apparatus, nucleus, and plasma membrane. For identifying translocations, BUNDLE  
497 gave the highest agreement with known HIV biology (i.e. published interactome data), particularly when  
498 coupled with SVM-classified data.

499         The model of inducible HIV in Jurkat T cells used here has advantages and disadvantages. One  
500 advantage is that the system provides a highly homogenous population of HIV-expressing cells suitable  
501 for mass spectrometric analysis<sup>13</sup>. A homogenous population is particularly important in spatial proteomic  
502 studies as mixed populations of cells might yield erroneous classifications of proteins due to mixtures of  
503 different states<sup>46</sup>. Another advantage is scalability. These experiments required just over  $3 \times 10^8$  cells for  
504 each technical replicate, or over  $1 \times 10^9$  cells for a single biological replicate, to be induced. In our initial  
505 attempts with fewer cells, centrifugation at higher RCF (110,000xg and 195,500xg) yielded insufficient  
506 protein mass for quality control and mass spectrometry (data not shown). This highlights an advantage of  
507 using this T cell line compared to using primary CD4+ T-cells<sup>48</sup>, which in principle would be more relevant  
508 but would require at least  $2 \times 10^9$  cells and extraordinary viral inocula to achieve a high-multiplicity,  
509 synchronized infection. A disadvantage of using this T cell system is that the cytoplasmic volume of the  
510 cell is relatively small. We required an order of magnitude more cells for each technical replicate here  
511 than was used in the D.O.M. studies of Itzhak et al., who used HeLa cells with larger cytoplasm.

512         In addition to these technical considerations for modeling viral infection/expression, the choice of  
513 fractionation method has practical and computational implications. The use of differential centrifugation  
514 here and by Itzhak et al. requires the downstream analysis of fewer fractions than gradient fractionation  
515 methods and is far less time-, resource-, and labor-intensive<sup>2</sup>. On the other hand, gradient fractionation  
516 methods seem to show increased resolution of protein classification<sup>21</sup>. In an attempt to increase the  
517 organellar resolution of the D.O.M method we used additional high-speed centrifugation steps to those  
518 described in the D.O.M. method of Itzhak et al. and found a significant increase in overall organellar  
519 resolution using seven fractions as compared to the original five (Fig. 2). Previous work by the Lilley  
520 group comparing differential centrifugation and gradient-based methods for fractionation revealed  
521 comparable downstream results for the two methods using U-2 OS cells with differential centrifugation  
522 having a slight advantage in resolving the cytosol and proteasome<sup>36</sup>, but whether this trend would hold in  
523 different cell types after viral infection or gene-expression is unclear. Generalizable rules for spatial

## T Cell Spatial Proteomics and Impact of HIV

524 proteomics might require comparisons of various fractionation and computational methods in multiple  
525 systems, or perhaps more likely, the specific experimental system and questions asked might be best  
526 addressed by a specific method. For example, to investigate translocations caused by HIV-1 Nef, better  
527 separation of membranous organelles (see Fig. S5 and S6) might have yielded more Nef-specific  
528 translocations.

529 Our findings on classification consistency and accuracy might influence the choice of classifier, at  
530 least for this model system. We found that SVM yielded higher consistency in classification than TAGM-  
531 MAP, although both suffered similar losses in consistency following HIV expression. In cases where  
532 infection or viral expression is expected to introduce greater noise in the data, as seems to be the case  
533 here, SVM may be the better option as it yielded a higher starting point for consistency. If lower tolerance  
534 to noise is acceptable, TAGM-MAP offers an advantageous alternative for both the mitochondria and ER.  
535 TAGM-MAP also suffered less loss of protein classification to unknown designations for uninduced  
536 replicates, perhaps due in part to the threshold used here for retaining SVM classification. While we used  
537 a basic median SVM algorithm score threshold for each organelle<sup>2</sup> to allow for raw comparisons of  
538 classifiers to existing spatial proteomes, this might have been overly stringent for certain organelles,  
539 which would explain the higher number of unknown designated proteins for SVM. An alternative method  
540 would be to introduce an organelle-dependent threshold that would cap false positives by comparing  
541 classifier outputs to gene ontology analysis and published spatial proteomes; this method was employed  
542 previously by the Lilley group<sup>1,36</sup>. We further note the fact that while SVM showed generally higher QSep  
543 scores for the mitochondria and ER it still underperformed compared to TAGM-MAP for these organelles.  
544 This suggested to us that organellar resolution as measured by QSep might be an imperfect measure of  
545 classification accuracy for a given organelle, a hypothesis that will need further examination.

546 Lastly, the choice of translocation identification method requires consideration of several factors,  
547 the first of which is the experimental design. Part of BUNDLE's power comes from its ability to factor  
548 multiple replicates of a condition into hit determination. Indeed, we saw a generally higher predictive  
549 power for BUNDLE compared to other methods. The ranked list of output is also useful in cases where  
550 resources are limited and only a few hits can be pursued. TRANSPIRE seemed to have poorer  
551 performance compared to other methods, but this might reflect our need to combine similarly fractionated

## T Cell Spatial Proteomics and Impact of HIV

552 organelle groups to reduce computational demand and increase resolution. In cases where individual  
553 organellar resolution is greater, TRANSPIRE might yield higher quality hits. Notably, both BUNDLE and  
554 TRANSPIRE require intensive computational resources, with TRANSPIRE requiring supercomputer  
555 access for larger, more complex datasets. In cases where computational power is limited, label-based  
556 methods would be suitable. Indeed, this method was employed by the Cristea group for their HCMV study  
557 with success<sup>7</sup>.

558         A challenge not addressed here is how to handle changes in whole-organellar behavior within  
559 spatial proteomics, such as might be induced by viruses. Indeed, we observed such a change within our  
560 data: peroxisomal marker proteins shifted in their fractionation behavior (peak abundance occurring at a  
561 higher *g*-force) when WT HIV was induced, becoming very similar in their behavior to marker proteins of  
562 the ER (Fig. S5). This effect was not observed for  $\Delta$ Nef (Fig. S6). A previous discussion of this issue by  
563 the Lilley group<sup>10</sup> highlighted the various possible causes of whole-organellar changes—e.g. differences  
564 in organelle protein content, lipid composition, morphology, etc.—as potentially problematic for the  
565 movement-reproducibility method of translocation identification<sup>5</sup>, but how these types of biochemical  
566 changes would affect translocation detection methods or classifiers is not obvious. In our preliminary  
567 analyses of the average distance between organellar clusters based on pairwise distances, we found that  
568 peroxisomes alone shifted in relation to other organelles following the induction of WT HIV (but not  $\Delta$ Nef).  
569 However, analyses using QSep, which additionally considers the average intracluster distance (i.e., the  
570 dispersal of the cluster that defines the organelle), gave a less clear picture, with the potential for multiple  
571 relative movements among organelles (data not shown). These observations suggest that computational  
572 methodology will affect conclusions about organellar behavior as a whole. While the uniform shift of all  
573 markers for a given organelle should have only a minor impact on classification, how likely such a shift is  
574 in the context of viral gene expression probably depends on the specific virus and the type of cytopathic  
575 effect it induces. Indeed, the greater sensitivity of TAGM-MAP to HIV expression for classifier consistency  
576 could be a manifestation of subtle changes in organelle behavior. Careful examination of marker proteins  
577 used as well as the integration of pre-existing knowledge on the cytopathic effects of the virus under  
578 study are doubtlessly important for interpretation of whole-organellar changes.

## T Cell Spatial Proteomics and Impact of HIV

579           With these considerations in mind, our findings underscore that studies of spatial proteomics  
580           require careful consideration of the question at hand to inform the choice of methodology. Our work and  
581           that of others highlights the potential differences in organellar resolution that can result from the choice of  
582           fractionation and analytical methods. Interest in a particular organelle and in specific types of  
583           translocations will factor into the choice of methods. Our findings offer a reference point for studies of viral  
584           infection by spatial proteomics, for general studies of the spatial proteome, and for the study of additional  
585           gene dropout mutants of HIV-1.

586

### 587 **Data availability:**

588           Mass spectrometry data (.RAW files and peptide identification tables) can be found on the  
589           ProteomeXchange database using project accession number PXD024716.

590

### 591 **Supplemental data:**

592           This article contains supplemental data.

593

### 594 **Acknowledgements:**

595           The authors would like to thank the NIH AIDS Reagent Program and The Pendleton Charitable  
596           Trust. The authors would like to also thank Hannah Carter, Max Qian, and Oliver Crook for productive  
597           discussions on the computational analysis. This work was partially supported by a UC San Diego Center  
598           for AIDS Research (UCSD CFAR) Developmental Award, an NIH funded program (P30AI036214). A.L.O.  
599           is supported by NIAID F31AI141111. C.A.S. is supported by a UCSD CFAR Developmental Award  
600           (P30AI036214). M.K.L. was supported by K08AI112394. A.R. and N.J.K. are funded by a grant to the  
601           HARC Center from the National Institutes of Health (P50AI150476 to N.J.K.). J.M.W. is supported by  
602           NIH/NIGMS Grants T32 GM007752 and NIH/NIAMS T32 AR064194. D.G. is supported by The  
603           Collaborative Center of Multiplexed Proteomics at UCSD. J.G. is supported by NIAID R01AI129706. All  
604           funding sources had no involvement in the design and execution of this study nor the final manuscript.

605

### 606 **Author contributions:**

## T Cell Spatial Proteomics and Impact of HIV

607 A.L.O., C.A.S., M.K.L., and J.G. conceived the design and scope of this study. M.K.L. created the  
608 inducible cell lines used in this study. A.L.O. and C.A.S. performed the fractionation experiments. A.L.O.,  
609 J.M.W., and D.G. performed pilot studies for the mass spectrometry analysis. A.R., K.S., and N.J.K.  
610 performed the mass spectrometry analysis. A.L.O. performed the computational analysis. A.L.O. and J.G.  
611 wrote the manuscript and all authors reviewed and edited the manuscript.

612

613 **Declaration of interests:** none



## T Cell Spatial Proteomics and Impact of HIV

- 614 1. Christoforou, A. *et al.* A draft map of the mouse pluripotent stem cell spatial proteome. *Nat.*  
615 *Commun.* **7**, 1–12 (2016).
- 616 2. Mulvey, C. M. *et al.* Using hyperLOPIT to perform high-resolution mapping of the spatial proteome.  
617 *Nat. Protoc.* **12**, 1110–1135 (2017).
- 618 3. Nightingale, D. J., Geladaki, A., Breckels, L. M., Oliver, S. G. & Lilley, K. S. The subcellular  
619 organisation of *Saccharomyces cerevisiae*. *Curr. Opin. Chem. Biol.* **48**, 86–95 (2019).
- 620 4. Borner, G. H. H. *et al.* Fractionation profiling: a fast and versatile approach for mapping vesicle  
621 proteomes and protein-protein interactions. *Mol. Biol. Cell* **25**, 3178–3194 (2014).
- 622 5. Itzhak, D. N., Tyanova, S., Cox, J. & Borner, G. H. H. Global, quantitative and dynamic mapping of  
623 protein subcellular localization. *Elife* **5**, 1–36 (2016).
- 624 6. Itzhak, D. N. *et al.* A Mass Spectrometry-Based Approach for Mapping Protein Subcellular  
625 Localization Reveals the Spatial Proteome of Mouse Primary Neurons. *Cell Rep.* **20**, 2706–2718  
626 (2017).
- 627 7. Jean Beltran, P. M., Mathias, R. A. & Cristea, I. M. A Portrait of the Human Organelle Proteome In  
628 Space and Time during Cytomegalovirus Infection. *Cell Syst.* **3**, 361–373 (2016).
- 629 8. Jean Beltran, P. M. *et al.* Infection-Induced Peroxisome Biogenesis Is a Metabolic Strategy for  
630 Herpesvirus Replication. *Cell Host Microbe* **24**, 526-541.e7 (2018).
- 631 9. Kennedy, M. A., Hofstadter, W. A. & Cristea, I. M. TRANSPIRE: A Computational Pipeline to  
632 Elucidate Intracellular Protein Movements from Spatial Proteomics Data Sets. *J. Am. Soc. Mass*  
633 *Spectrom.* **31**, 1422–1439 (2020).
- 634 10. Crook, O. M., Davies, C. T. R., Gatto, L., Kirk, P. D. W. & Lilley, K. S. Inferring differential  
635 subcellular localisation in comparative spatial proteomics using BUNDLE. *bioRxiv*  
636 2021.01.04.425239 (2021) doi:10.1101/2021.01.04.425239.
- 637 11. Crook, O. M., Breckels, L. M., Lilley, K. S., Kirk, P. D. W. & Gatto, L. A Bioconductor workflow for  
638 the Bayesian analysis of spatial proteomics. *F1000Research 2019 8446* **8**, 446 (2019).
- 639 12. Gatto, L., Breckels, L. M., Wiczorek, S., Burger, T. & Lilley, K. S. Mass-spectrometry-based  
640 spatial proteomics data analysis using pRoloc and pRolocdata. *Bioinformatics* **30**, 1322–1324  
641 (2014).

## T Cell Spatial Proteomics and Impact of HIV

- 642 13. Lapek, J. D., Lewinski, M. K., Wozniak, J. M., Guatelli, J. & Gonzalez, D. J. Quantitative Temporal  
643 Viromics of an Inducible HIV-1 Model Yields Insight to Global Host Targets and Phospho-  
644 Dynamics Associated with Protein Vpr. *Mol. Cell. Proteomics* **16**, 1447–1461 (2017).
- 645 14. Guy, B., Rivière, Y., Dott, K., Regnault, A. & Kieny, M. P. Mutational analysis of the HIV nef  
646 protein. *Virology* **176**, 413–425 (1990).
- 647 15. Yu, G. & Felsted, R. L. Effect of myristoylation on p27nef subcellular distribution and suppression  
648 of HIV-LTR transcription. *Virology* **187**, 46–55 (1992).
- 649 16. Chowers, M. Y. *et al.* Optimal infectivity in vitro of human immunodeficiency virus type 1 requires  
650 an intact nef gene. *J. Virol.* **68**, 2906–14 (1994).
- 651 17. Pawlak, E. N., Dirk, B. S., Jacob, R. A., Johnson, A. L. & Dikeakos, J. D. The HIV-1 accessory  
652 proteins Nef and Vpu downregulate total and cell surface CD28 in CD4+ T cells. *Retrovirology* **15**,  
653 6 (2018).
- 654 18. Thoulouze, M. I. *et al.* Human Immunodeficiency Virus Type-1 Infection Impairs the Formation of  
655 the Immunological Synapse. *Immunity* **24**, 547–561 (2006).
- 656 19. Sugden, S. M., Bego, M. G., Pham, T. N. Q. & Cohen, É. A. Remodeling of the host cell plasma  
657 membrane by HIV-1 nef and Vpu: A strategy to ensure viral fitness and persistence. *Viruses* **8**, 1–  
658 30 (2016).
- 659 20. Ramirez *et al.* Plasma Membrane-Associated Restriction Factors and Their Counteraction by HIV-  
660 1 Accessory Proteins. *Cells* **8**, 1020 (2019).
- 661 21. Gatto, L., Breckels, L. M. & Lilley, K. S. Assessing sub-cellular resolution in spatial proteomics  
662 experiments. *Curr. Opin. Chem. Biol.* **48**, 123–149 (2019).
- 663 22. Calvo, S. E., Clauser, K. R. & Mootha, V. K. MitoCarta2.0: An updated inventory of mammalian  
664 mitochondrial proteins. *Nucleic Acids Res.* **44**, D1251–D1257 (2016).
- 665 23. Rhee, H. *et al.* Proteomic Mapping of Mitochondria. *Science (80-. )*. **339**, 1328 (2013).
- 666 24. Lübke, T., Lobel, P. & Sleat, D. E. Proteomics of the lysosome. *Biochimica et Biophysica Acta -*  
667 *Molecular Cell Research* vol. 1793 625–635 (2009).
- 668 25. Thul, P. J. *et al.* A subcellular map of the human proteome. *Science (80-. )*. **356**, (2017).
- 669 26. Jäger, S. *et al.* Global landscape of HIV–human protein complexes. *Nat. 2011 4817381* **481**, 365–

## T Cell Spatial Proteomics and Impact of HIV

- 670 370 (2011).
- 671 27. Fu, W. *et al.* Human immunodeficiency virus type 1, human protein interaction database at NCBI.  
672 *Nucleic Acids Res.* **37**, D417–D422 (2009).
- 673 28. Tokarev, A. *et al.* Pharmacologic Inhibition of Nedd8 Activation Enzyme Exposes CD4-Induced  
674 Epitopes within Env on Cells Expressing HIV-1. *J. Virol.* **90**, 2486–2502 (2016).
- 675 29. Chesebro, B., Wehrly, K., Nishio, J. & Perryman, S. Macrophage-tropic human immunodeficiency  
676 virus isolates from different patients exhibit unusual V3 envelope sequence homogeneity in  
677 comparison with T-cell-tropic isolates: definition of critical amino acids involved in cell tropism. *J.*  
678 *Virol.* **66**, 6547–54 (1992).
- 679 30. Abacioglu, Y. H. *et al.* Epitope Mapping and Topology of Baculovirus-Expressed HIV-1 gp160  
680 Determined with a Panel of Murine Monoclonal Antibodies. *AIDS Res. Hum. Retroviruses* **10**,  
681 371–381 (1994).
- 682 31. Eng, J. K., McCormack, A. L. & Yates, J. R. An approach to correlate tandem mass spectral data  
683 of peptides with amino acid sequences in a protein database. *J. Am. Soc. Mass Spectrom.* **5**, 976–  
684 989 (1994).
- 685 32. Käll, L., Canterbury, J. D., Weston, J., Noble, W. S. & MacCoss, M. J. Semi-supervised learning  
686 for peptide identification from shotgun proteomics datasets. *Nat. Methods* **2007 411 4**, 923–925  
687 (2007).
- 688 33. Elias, J. E. & Gygi, S. P. Target-decoy search strategy for increased confidence in large-scale  
689 protein identifications by mass spectrometry. *Nat. Methods* **2007 43 4**, 207–214 (2007).
- 690 34. Adhikari, S. *et al.* A high-stringency blueprint of the human proteome. *Nat. Commun.* **2020 111 11**,  
691 1–16 (2020).
- 692 35. Szklarczyk, D. *et al.* STRING v11: Protein-protein association networks with increased coverage,  
693 supporting functional discovery in genome-wide experimental datasets. *Nucleic Acids Res.* **47**,  
694 D607–D613 (2019).
- 695 36. Geladaki, A. *et al.* Combining LOPIT with differential ultracentrifugation for high-resolution spatial  
696 proteomics. *Nat. Commun.* **2019 101 10**, 1–15 (2019).
- 697 37. Hung, C.-H. *et al.* HIV-1 Nef Assembles a Src Family Kinase-ZAP-70/Syk-PI3K Cascade to

## T Cell Spatial Proteomics and Impact of HIV

- 698 Downregulate Cell-Surface MHC-I. *Cell Host Microbe* **1**, 121–133 (2007).
- 699 38. Río-Iñiguez, I. del *et al.* HIV-1 Nef Hijacks Lck and Rac1 Endosomal Traffic To Dually Modulate  
700 Signaling-Mediated and Actin Cytoskeleton–Mediated T Cell Functions. *J. Immunol.* **201**, 2624–  
701 2640 (2018).
- 702 39. Federico, M. *et al.* HIV-1 Nef activates STAT1 in human monocytes/macrophages through the  
703 release of soluble factors. *Blood* **98**, 2752–2761 (2001).
- 704 40. Benichou, S. *et al.* Physical interaction of the HIV-1 Nef protein with beta-COP, a component of  
705 non-clathrin-coated vesicles essential for membrane traffic. *J. Biol. Chem.* **269**, 30073–30076  
706 (1994).
- 707 41. Piguet, V. *et al.* Nef-Induced CD4 Degradation: A Diacidic-Based Motif in Nef Functions as a  
708 Lysosomal Targeting Signal through the Binding of beta-COP in Endosomes. *Cell* **97**, 63–73  
709 (1999).
- 710 42. Stella, A. O. & Turville, S. All-Round Manipulation of the Actin Cytoskeleton by HIV. *Viruses* 2018,  
711 *Vol. 10, Page 63* **10**, 63 (2018).
- 712 43. Chaudhuri, R., Lindwasser, O. W., Smith, W. J., Hurley, J. H. & Bonifacino, J. S. Downregulation  
713 of CD4 by Human Immunodeficiency Virus Type 1 Nef Is Dependent on Clathrin and Involves  
714 Direct Interaction of Nef with the AP2 Clathrin Adaptor. *J. Virol.* **81**, 3877–3890 (2007).
- 715 44. Craig, H. M., Pandori, M. W. & Guatelli, J. C. Interaction of HIV-1 Nef with the cellular dileucine-  
716 based sorting pathway is required for CD4 down-regulation and optimal viral infectivity. *Proc. Natl.*  
717 *Acad. Sci. U. S. A.* **95**, 11229–34 (1998).
- 718 45. Jia, X. *et al.* Structural basis of evasion of cellular adaptive immunity by HIV-1 Nef. *Nat. Struct.*  
719 *Mol. Biol.* 2012 197 **19**, 701–706 (2012).
- 720 46. Gatto, L. *et al.* A Foundation for Reliable Spatial Proteomics Data Analysis. *Mol. Cell. Proteomics*  
721 **13**, 1937–1952 (2014).
- 722 47. Davies, A. K. *et al.* AP-4 vesicles contribute to spatial control of autophagy via RUSC-dependent  
723 peripheral delivery of ATG9A. *Nat. Commun.* **9**, 3958 (2018).
- 724 48. Naamati, A. *et al.* Functional proteomic atlas of HIV infection in primary human CD4+ T cells. *Elife*  
725 **8**, (2019).

## T Cell Spatial Proteomics and Impact of HIV

726 **Figure 1:** Inducible HIV-1 Jurkat cell lines yield a near pure population of HIV-expressing cells suitable for  
727 fractionation by differential centrifugation. A) Equal numbers of doxycycline-inducible wild-type and  $\Delta$ Nef  
728 HIV Jurkat cells were induced or left uninduced for 18 hours then fractionated by Dounce homogenization  
729 in a hypotonic lysis buffer. Cell homogenates were put through a differential centrifugation protocol,  
730 discarding the nuclear pellet (1,000xg) and lysing remaining pellets in 2.5% SDS buffer. Fractions were  
731 labeled for TMT-10 multiplexing and further offline HPLC fractionation. All multiplexes were run for 3  
732 hours on LC-MS<sup>3</sup>. B) Western blot showing induction of HIV p55, gp160, gp41, Nef, and Vpu with a  
733 GAPDH loading control. Cells were induced for 0, 4, 8, 12, 16, and 18 hours, lysed, then a portion of  
734 these cell lysates was run on 10% SDS-PAGE gels. C) Flow cytometry analysis of remaining sample from  
735 1B. HIV-1 expression peaked at ~95% of cells p24+ by 18 hours. D) Average percentage of total cellular  
736 protein detected in each fraction by BCA protein assay. Bars represent the mean value for a given  
737 fraction based on the average from each biological replicate. Error bars are one standard deviation. All  
738 BCA assays were performed in technical triplicate on 10-fold dilutions for each biological replicate. E)  
739 Western blots for cell fractions of inducible wild-type HIV Jurkat cells (left) and  $\Delta$ Nef HIV Jurkat cells  
740 (right), 18 hours post-induction. Blots shown are representative of both biological replicates.

741

742 **Figure 2:** Analysis of fractionation data reveals increased organellar resolution from added fractions and  
743 thresholding TAGM-MAP data. A) Diagram of the computational methods used here. For SVM  
744 classification, the raw data of individual technical replicates were row normalized. For TAGM-MAP  
745 classification, the raw data of individual technical replicates were PCA transformed, with the first four  
746 principal components (PC1-4) carried forward for analysis. Both SVM and TAGM-MAP classified data  
747 were fed into BUNDLE or label-based movement analysis. Lastly, for analysis with TRANSPIRE,  
748 individual technical replicates were row normalized then averaged together. B) Boxplot of QSep scores  
749 for SVM analysis of WT uninduced samples using the original 5 fractions described by Itzhak et al.<sup>5</sup>,  
750 adding a 110,000xg fraction (6 fractions), or adding both a 110,000xg and a 195,500xg fraction (7  
751 fractions). C) Boxplot of QSep scores for TAGM-MAP analysis of WT uninduced samples comparing  
752 using no threshold for remaining classified, a 50% chance of classification, a 75% chance of  
753 classification, or a 90% chance of classification. Statistical significance is calculated using a two-sided,

## T Cell Spatial Proteomics and Impact of HIV

754 independent Student's t-test with Welch's correction for unequal variance. Boxplots show median, not  
755 mean, line.

756

757 **Figure 3:** Classification with SVM shows greater consistency than TAGM-MAP classification. A) Proteins  
758 were classified by SVM and the most frequent organellar classification was identified along with its  
759 frequency, i.e. number of technical replicates classified as such. Left pie chart shows consistency of  
760 classification for WT uninduced replicates and right pie chart shows WT induced replicates. B) Same as  
761 A), but classification by TAGM-MAP. C) Average distribution of proteins across organelles for each  
762 indicated condition. All charts consider the same common proteins found across all WT replicates (4,765  
763 proteins).

764

765 **Figure 4:** Concordance of SVM and TAGM-MAP classifications depends on organelle and expression of  
766 HIV. A) Heat map of common proteins that were consistently classified (proteins classified consistently in  
767 at least 4 of 6 replicates) by both SVM and TAGM-MAP for uninduced condition. Annotations indicate  
768 number of proteins in a given scenario. B) Same as A) for induced condition.

769

770 **Figure 5:** Validation of protein classification reveals higher performance for ER and mitochondria using  
771 TAGM-MAP, but better performance for Golgi apparatus, nucleus, and plasma membrane using SVM. A)  
772 Percentage of detected proteins from MitoCarta2.0 database<sup>22</sup>, Rhee et al. mitochondrial matrix study<sup>23</sup>,  
773 or Lubke lysosome proteome<sup>24</sup> that were consistently classified (proteins classified consistently in at least  
774 4 of 6 replicates) in line with the respective reference. Numbers above bars indicate the total number of  
775 proteins from that reference that were detected and classified for a given method. B) Proteins classified  
776 by SVM or TAGM-MAP were cross-referenced against the Human Protein Atlas and any protein  
777 considered to be singularly localized with an Enhanced rating was kept. The percentage of these proteins  
778 that were consistently classified by SVM or TAGM-MAP into the HPA-designated organelle is shown.  
779 Numbers above bars indicate the number of HPA proteins considered for each organelle. For conditions  
780 with Unknown proteins excluded, those proteins that were consistently classified as Unknown were  
781 removed from the analysis.

## T Cell Spatial Proteomics and Impact of HIV

782

783 **Figure 6:** Detection of protein translocations by BANDLE analysis of SVM-classified data shows the  
784 highest rate of identifying known HIV interactors. A) The percentage of hits from each method that are in  
785 the Jäger HIV interactome<sup>26</sup> (left bars) or the NIH HIV interactome<sup>27</sup> (right bars) is shown. Dashed lines  
786 indicate the percentage of hits that would be expected by chance based on the proportion of the human  
787 proteome represented in each interactome. B) Venn diagram of top 250 hits from SVM-based BANDLE  
788 for WT and  $\Delta$ Nef replicates. Three of the hits from the  $\Delta$ Nef analysis were not detected by MS in WT  
789 replicates and were thus removed from consideration.

Figure 1

A)

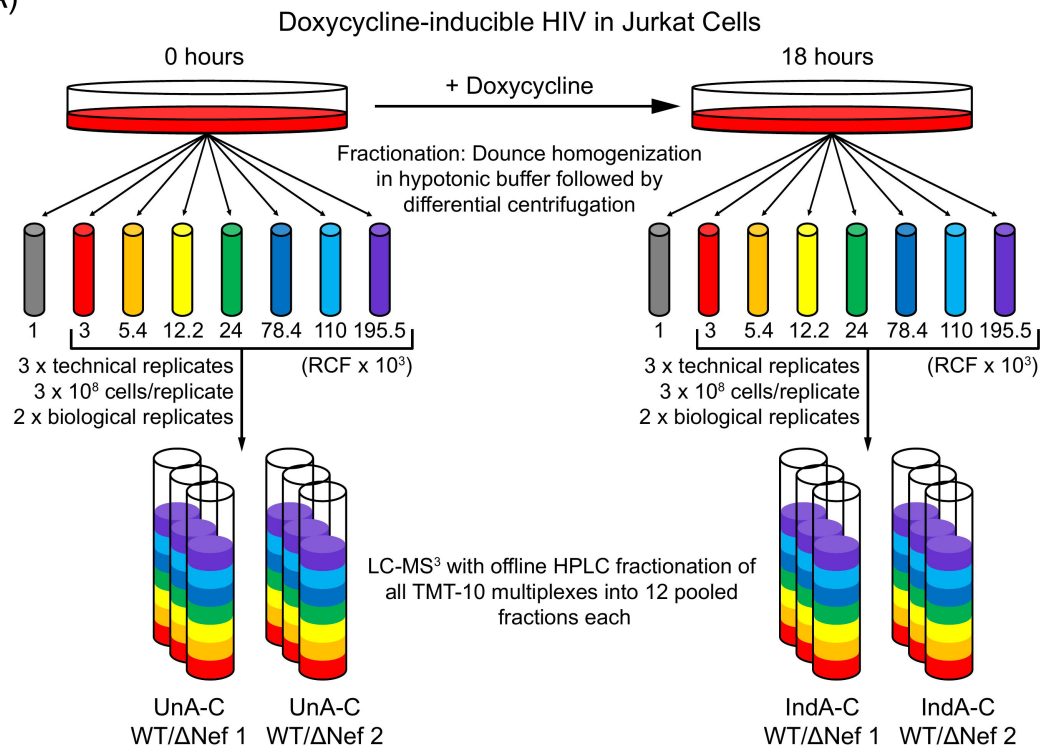

B)

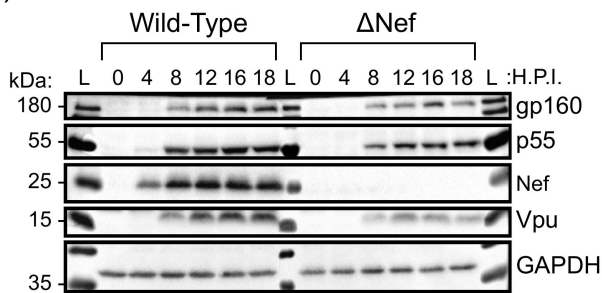

C)

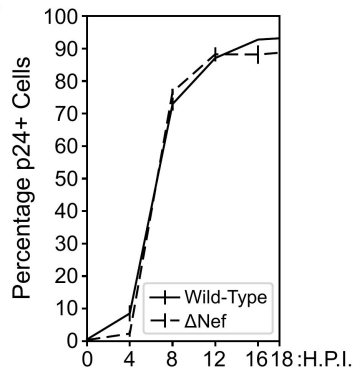

D)

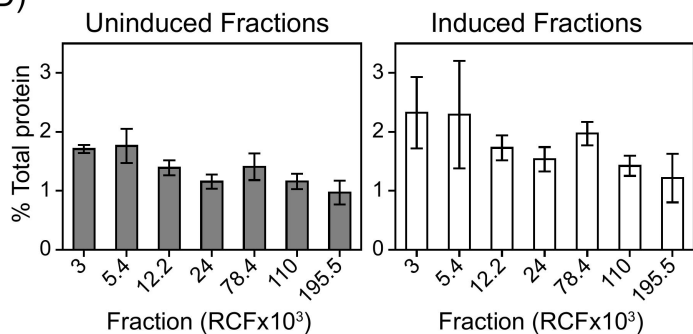

E)

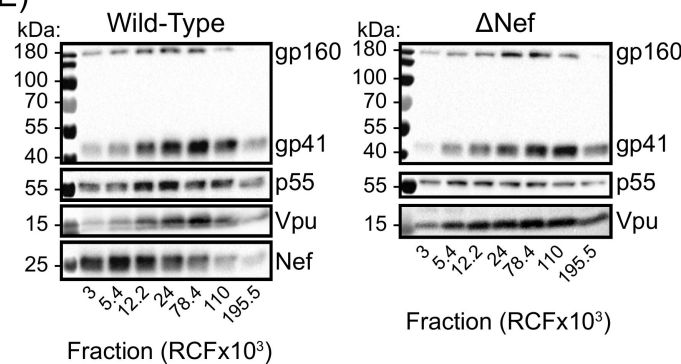



A)

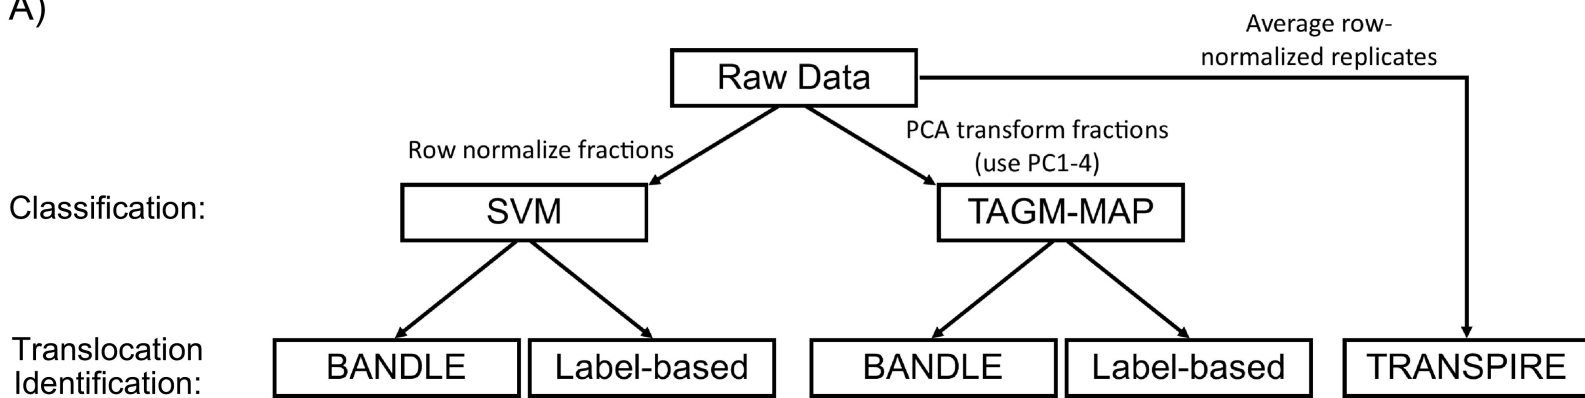

B)

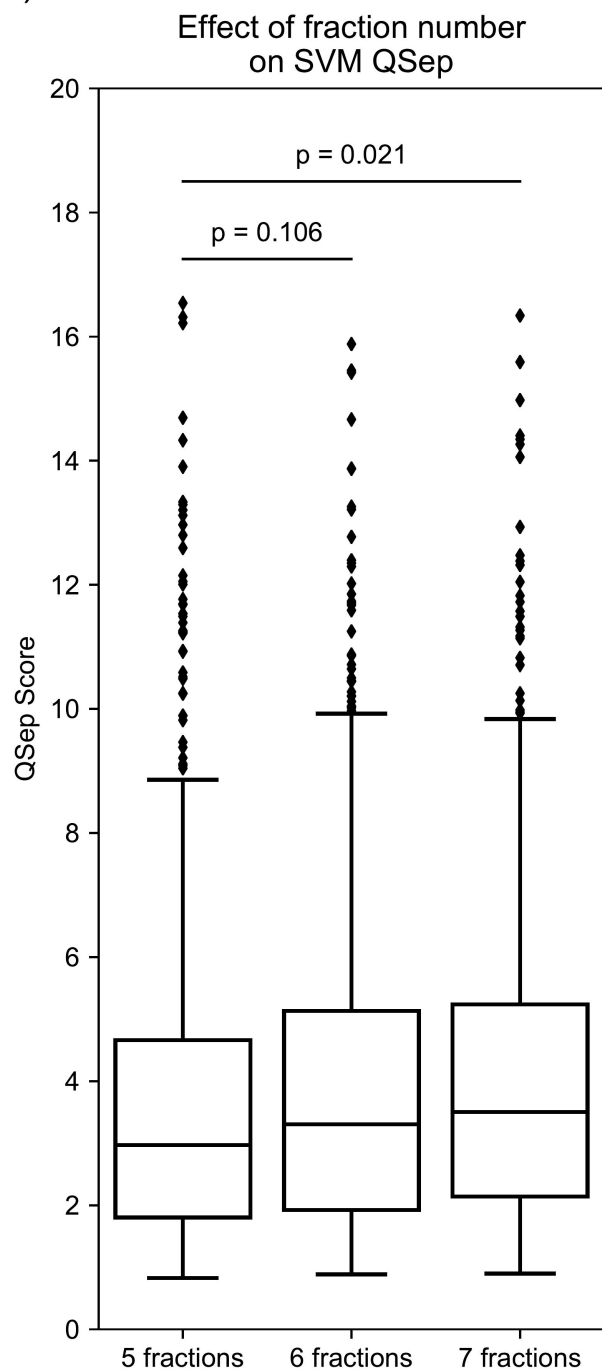

C)

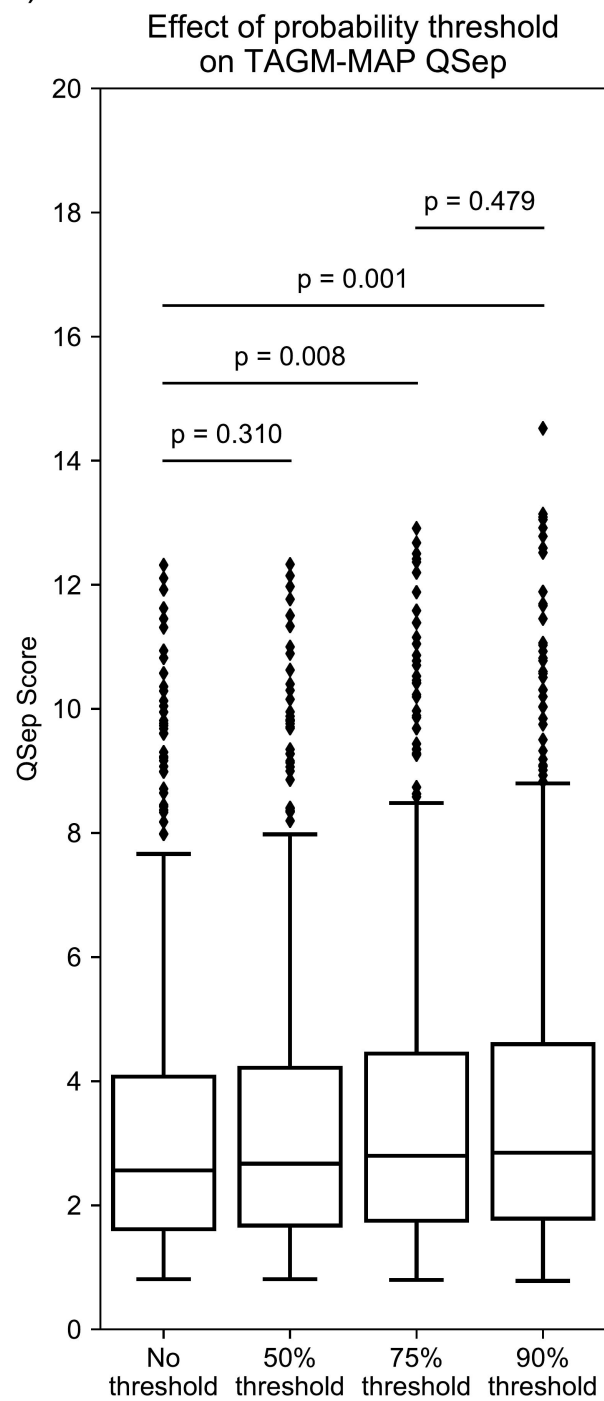

Figure 3

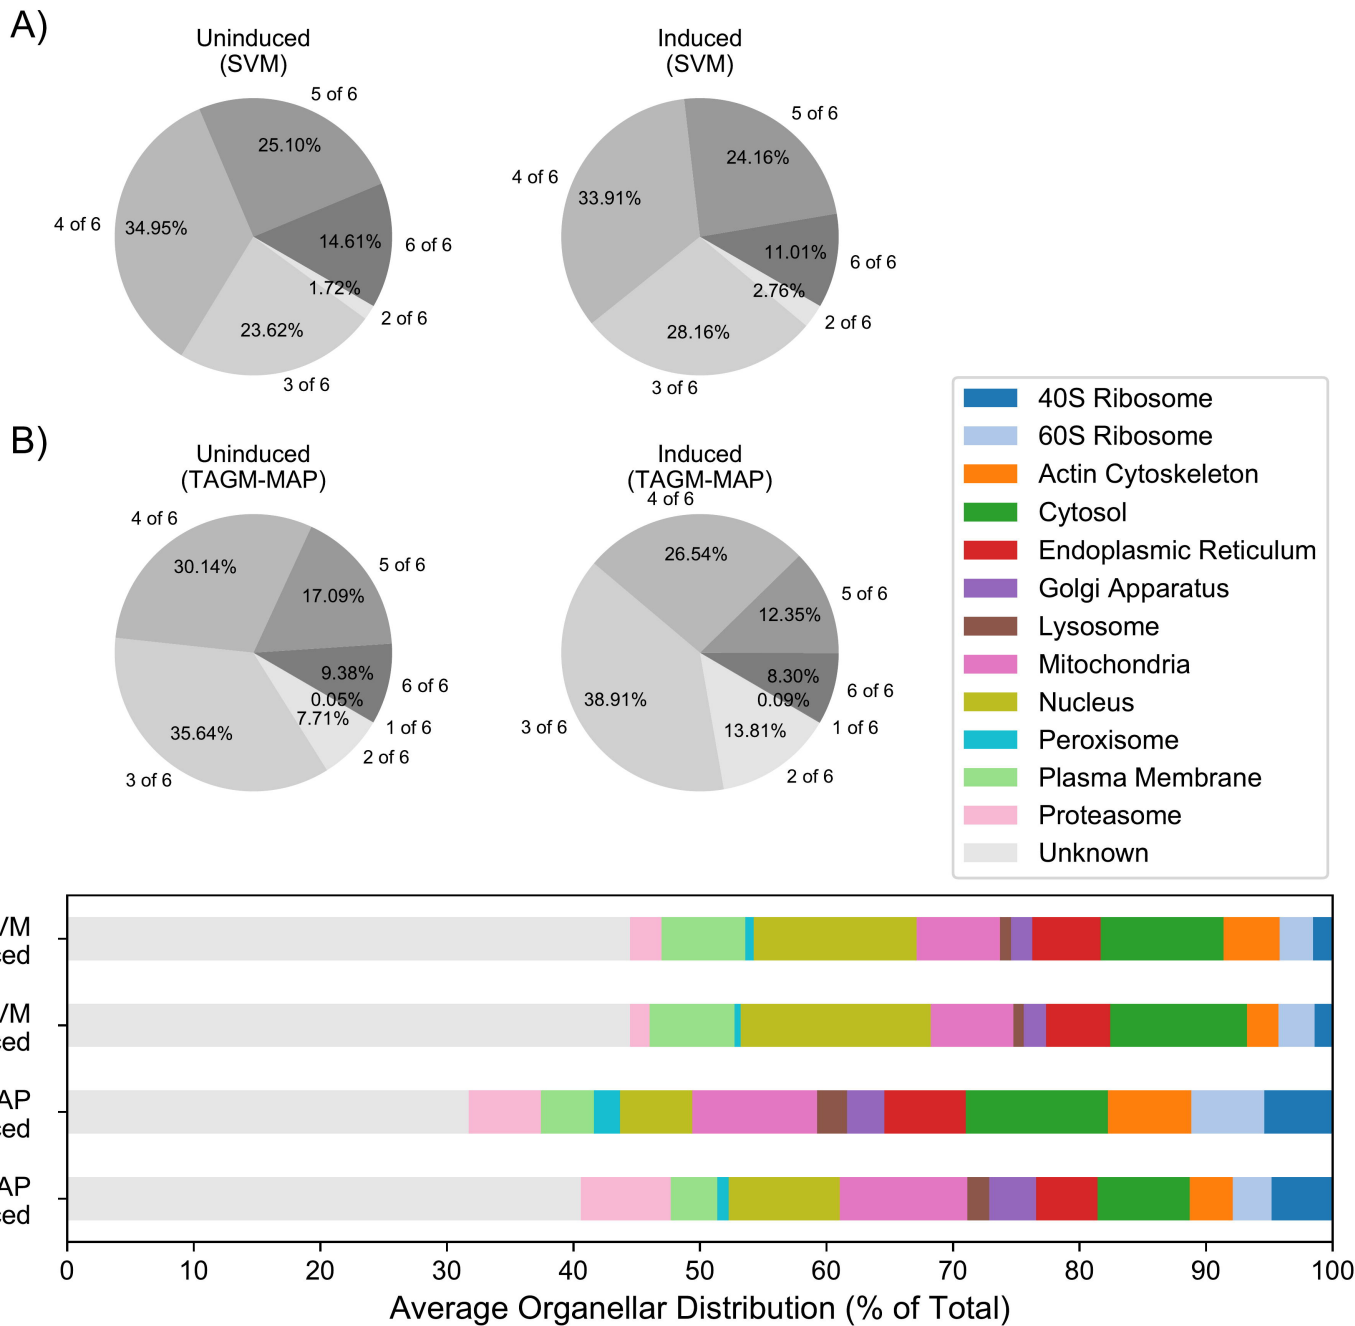

Figure 4

A)

## Uninduced (1,863 proteins)

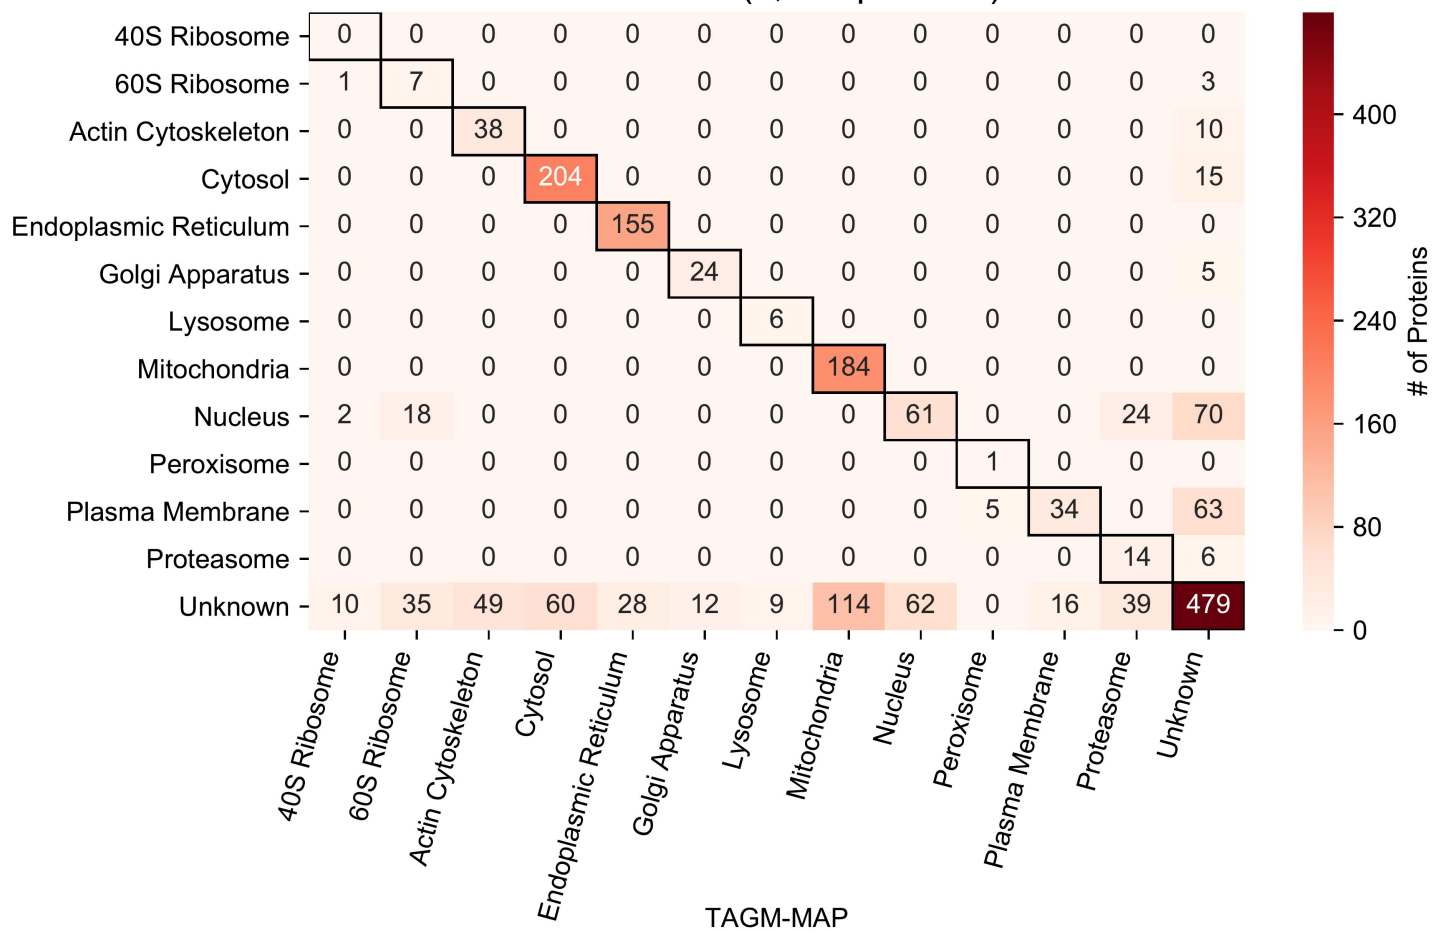

B)

## Induced (1,448 proteins)

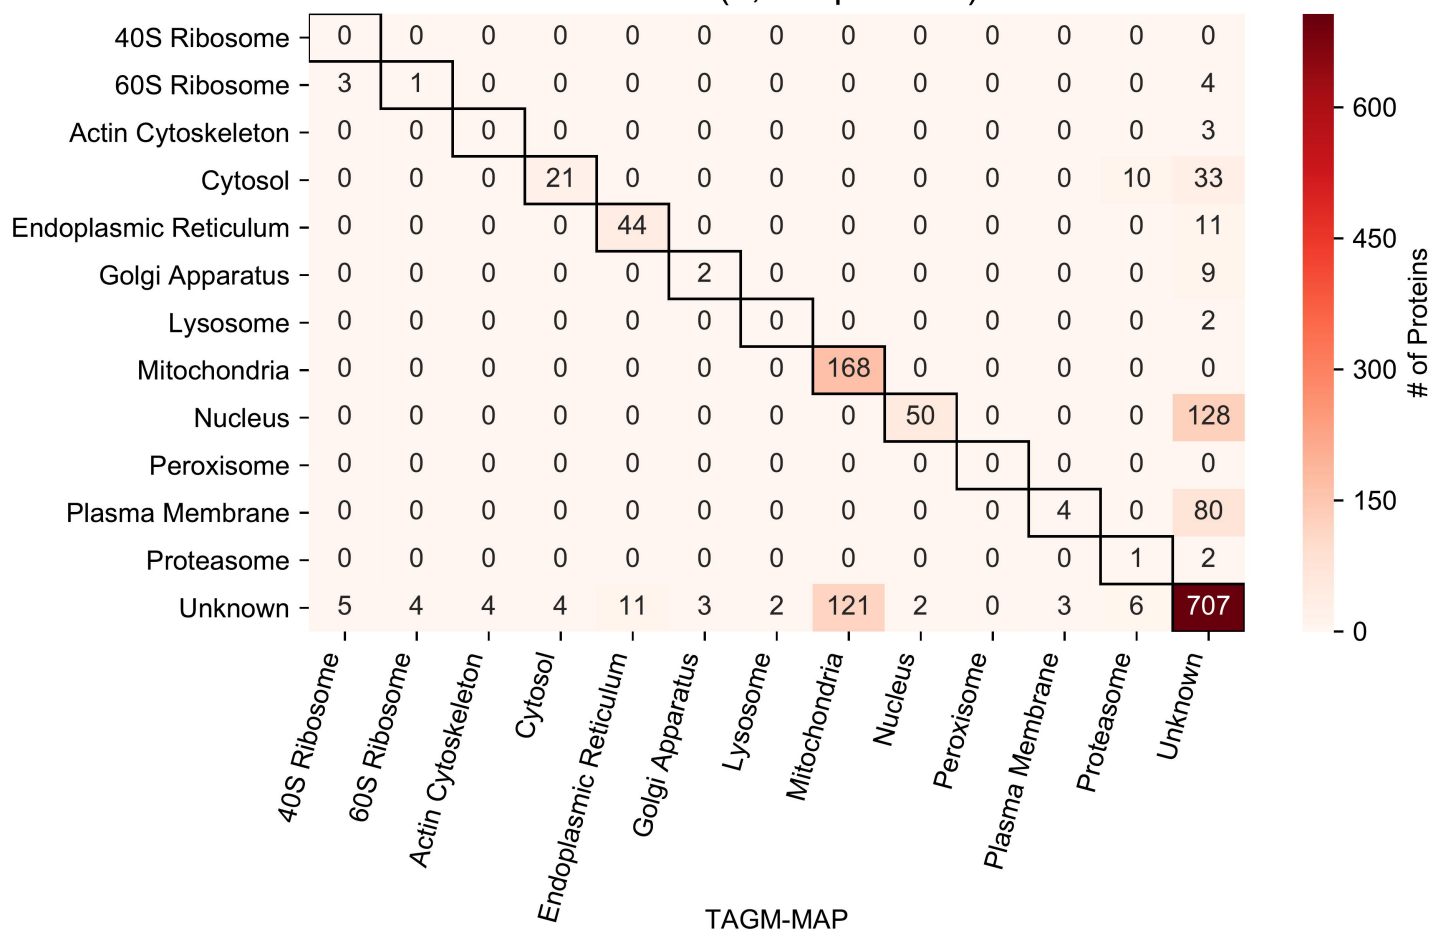

Figure 5

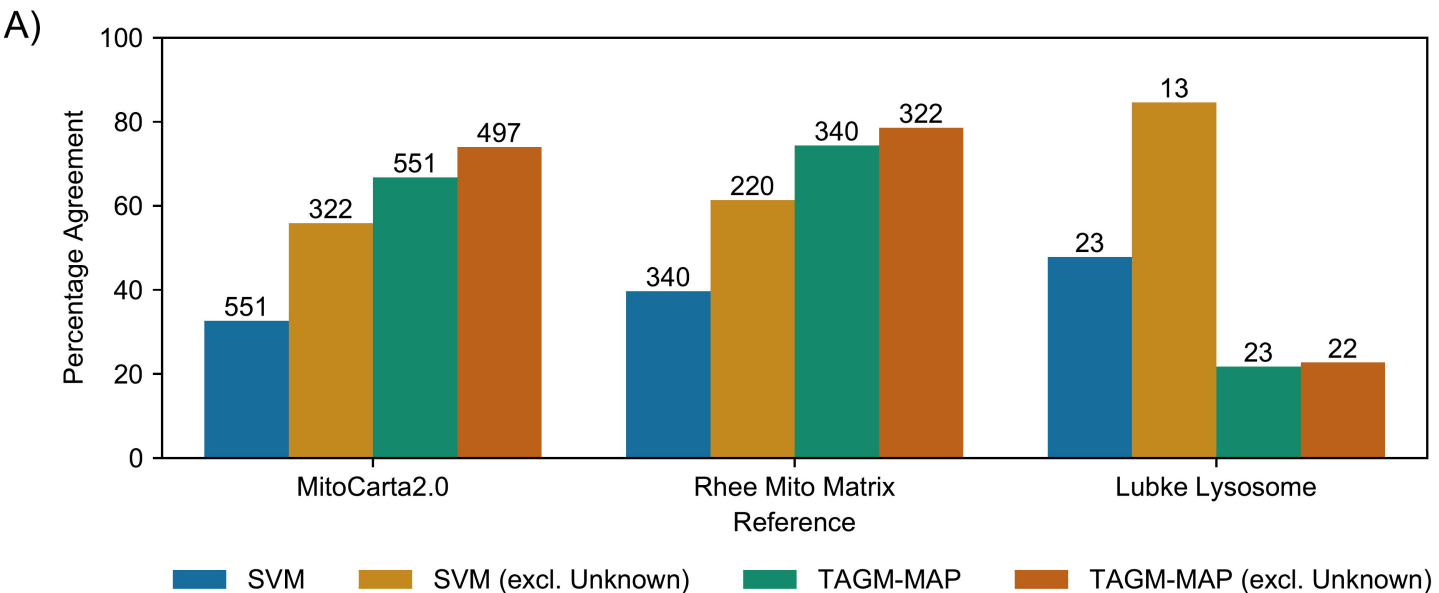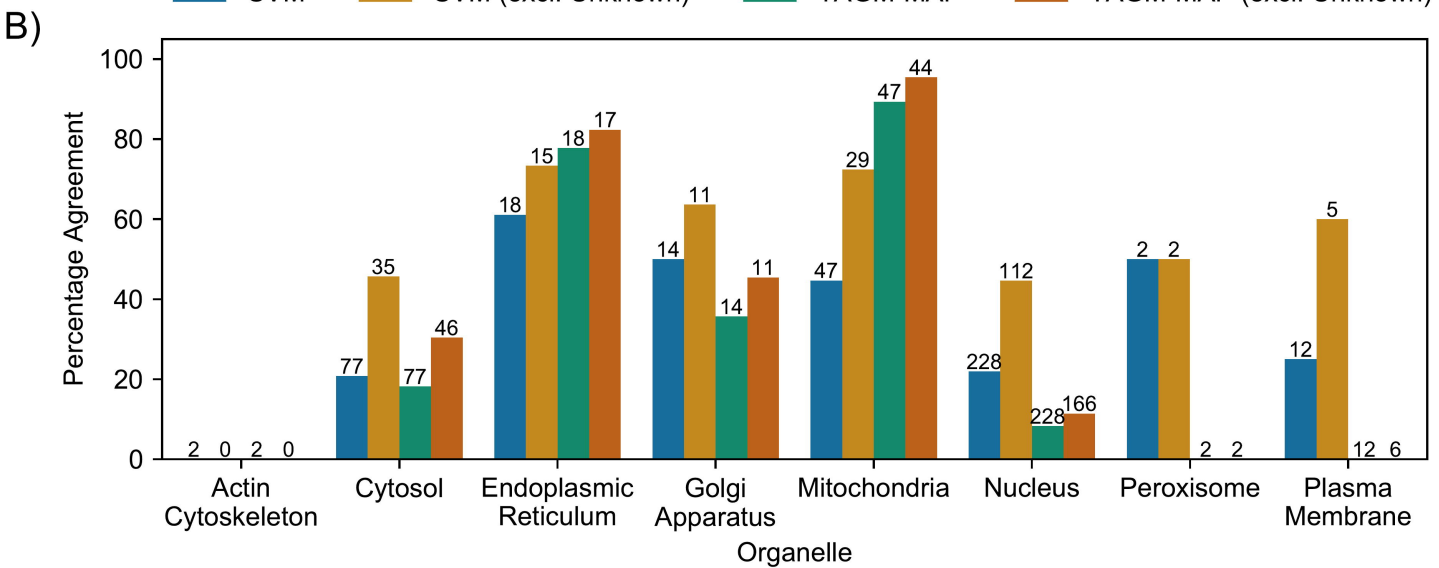

Figure 6

A)

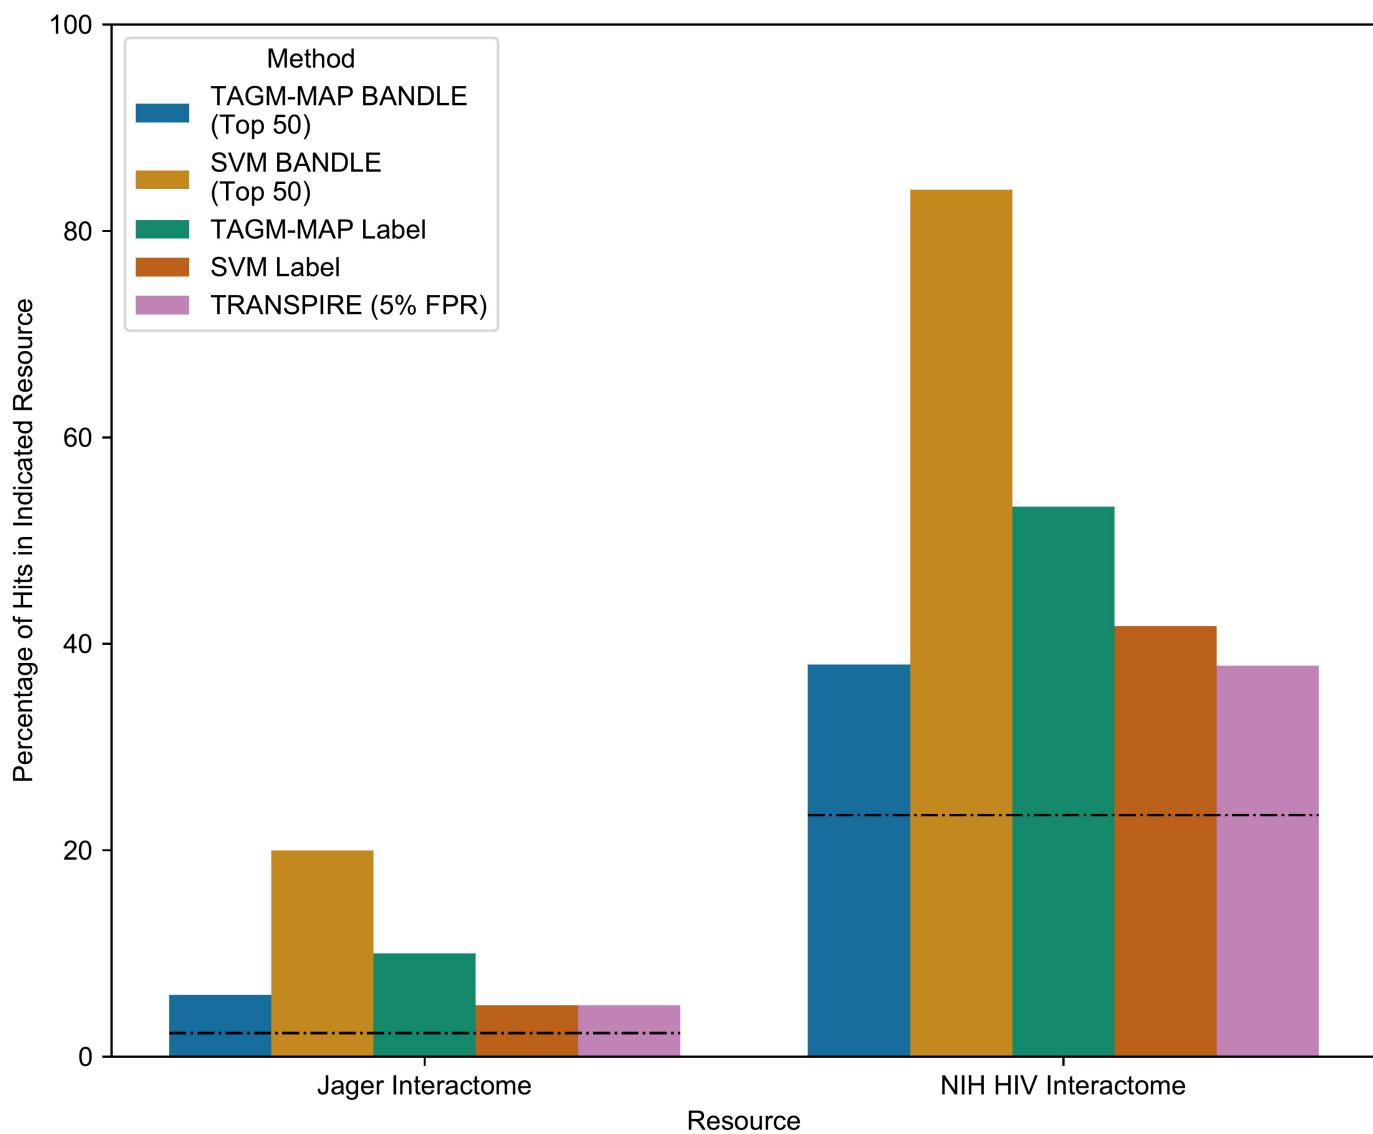

B)

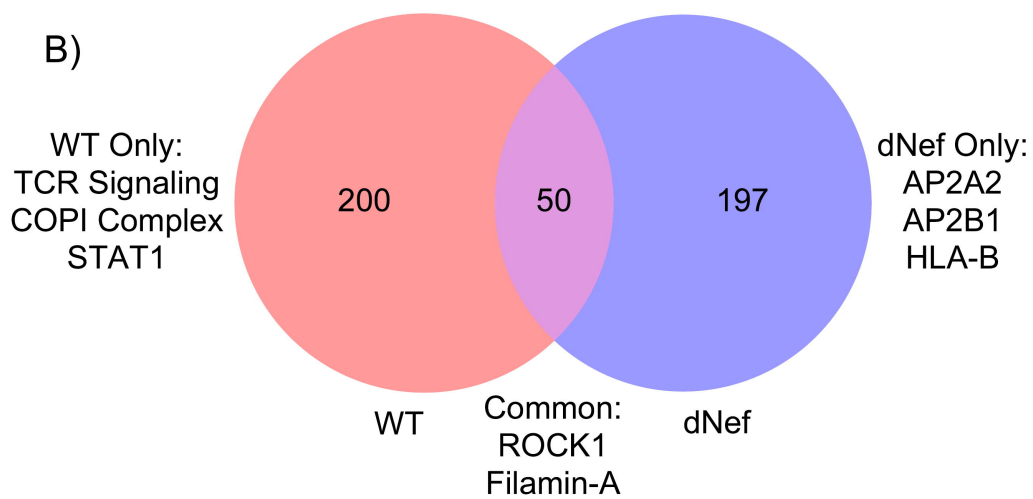

Source: https://www.biorxiv.org/content/10.1101/2021.03.17.435902v2.full.pdf
